# Supplementary material for: Regioselective synthesis of 4-arylamino-1,2-naphthoquinones in eutectogel as a confined reaction medium using LED light
Source: Royal Society of Chemistry journal article supplement (doi:10.1039/d4ob00140k), 2024-01-01
Supplement: d4ob00140k1.pdf [file d4ob00140k1.pdf]

*Supporting Information*

**Regioselective Synthesis of 4-Arylamino-1,2-Naphthoquinones in  
Eutectogel as a Confined Reaction Media using LED Light**

R. Vara Prasad, ‡<sup>a</sup> Yogendra Kumar, ‡<sup>a</sup> R. Arun Kumar,<sup>a</sup> Tohira Banoo,<sup>a</sup>  
and Subbiah Nagarajan<sup>a\*</sup>

---

**Table of contents**

|                                    |            |
|------------------------------------|------------|
| <b>1. Experimental Section</b>     | <b>S2</b>  |
| <b>2. Synthesis</b>                | <b>S4</b>  |
| <b>3. Optimization table</b>       | <b>S4</b>  |
| <b>4. Characterization studies</b> | <b>S5</b>  |
| <b>5. Gelation studies</b>         | <b>S13</b> |
| <b>6. NMR and HRMS spectra</b>     | <b>S15</b> |
| <b>7. IR</b>                       | <b>S39</b> |

## **Experimental Section**

### **1. General materials and methods**

All reagents and solvents used for the synthesis of 4-(hydroxymethyl)-1,3:2,4-dibenzylidene-D-sorbitol and 4-arylamino-1,2-naphthoquinones were purchased from commercial suppliers such as Merck, Aldrich, Finar, SRL and Avra chemicals and were used without purification. For the compound purification and recrystallization, LR-grade solvents were employed. AR-grade solvents were used for the gelation studies. The pre-coated Merck silica gel plates (TLC Silica gel 60 F<sub>254</sub>) were used to monitor the reaction progress and visualized the spots using any one or the combination of the following visualizing agents such as UV detection, KMnO<sub>4</sub>, p-anisaldehyde, H<sub>2</sub>SO<sub>4</sub> spray, or molecular iodine.

### **2. NMR and HRMS**

<sup>1</sup>H and <sup>13</sup>C NMR spectra were recorded on a Bruker Avance 400 MHz instrument either in CDCl<sub>3</sub> or DMSO-d<sub>6</sub> at room temperature. Chemical shifts (δ) are reported in parts per million (ppm) with reference to the internal standard TMS and coupling constants (J) are given in Hz. Proton multiplicity is assigned using the following abbreviations: singlet (s), doublet (d), triplet (t), quartet (q), and multiplet (m). High-resolution MS analysis were performed on an Agilent 6520 Q-TOF instrument by dissolving the solid sample in methanol or any other suitable solvent.

### **3. Gelation Studies**

To a known quantity of HMDBS taken in a glass vial, an appropriate amount of solvent was added and sealed tightly, and the system was heated until the solid was completely dissolved. The homogeneous solution thus obtained is allowed to cool slowly to rt. The gelation ability of HMDBS can be observed by naked eye by inverting the test tube. In the inverted test tube, a sample exhibiting no gravitational flow is referred as gel “G”, instead it remains as solution is referred as “S”. If the compound is insoluble, it is referred as “I”. Precipitation and crystallization observed in the test tube is denoted as “P” and “Crys” respectively.

### **4. Morphological study**

The morphology of the gels was investigated using optical microscopy and scanning electron microscopy. The gel was prepared at a critical gelation concentration and placed over a glass plate and viewed using a Carl Zeiss Axio Scope A1 fluorescent/phase-contrast microscope. The xerogel was used for SEM analysis, which

is prepared by taking a suitable quantity of eutectogel and disperse in water. DES in the 3D fibrous network is exchanged slowly with water and the resultant gel is dried and used.

## **5. Rheological measurements**

The viscoelastic behaviour of the gels was identified using a stress-controlled rheometer (Anton Paar 302 rheometer) equipped with a steel-coated parallel plate geometry of 25 mm diameter. The rheological behaviour of the gels was investigated by keeping the gel sample over the parallel plate at 23 °C. A 1 mm gap has been maintained between the two parallel plates and the excess gel squeezing out of the parallel plate was trimmed and the measurements were done.

## **6. FT-IR studies**

Infrared (IR) spectra were recorded from 400 – 4000  $\text{cm}^{-1}$  using KBr in Perkin Elmer spectrum 100 spectrophotometer. Agilent Q-TOF 6230 instrument were used.

## **7. Formation of deep eutectic gel**

Deep eutectic solvent is prepared by mixing a suitable quantity of choline chloride ChCl (HBA) and Ethylene glycol/ Glycerol/ Urea (HBD) in a round bottom flask and stirred at 70 °C till a homogeneous solution is formed. To the formed DES, HMBDS gelator is added and heated till the gelator dissolves and left to stand for the gel formation.

## **2 Synthesis**

### **(a) Procedure for the synthesis of 4-hydroxymethyl benzaldehyde (2)**

To a stirred solution of terephthalaldehyde **1** (1eq) in dry THF at 0 °C,  $\text{NaBH}_4$  (0.3 eq) is added in portions. The mixture was stirred for 6h. After completion of the reaction as identified by TLC, 1N HCl is added to the mixture and further stirred for 20 min. Solvent was removed by under reduced pressure and the residue is extracted with ethyl acetate. Column chromatography was performed to obtain the pure product.<sup>7</sup>

### **(b) Procedure for the synthesis of 4-(hydroxymethyl)-1,3:2,4-dibenzylidene-D-sorbitol (4)**

To a stirred solution of D-Sorbitol **3** (1 mmol) in acetonitrile (10 mL) at rt under  $\text{N}_2$  atmosphere, 4-hydroxymethyl benzaldehyde **2** (2.1 mmol) and Dowex 50WX8 were added. The reaction mixture was stirred for about 24 h at 70 °C. After completion of the reaction as identified by TLC, the reaction mixture was allowed to cool down to room temperature. The formed precipitate is dissolved in hot cyrene and separate the catalyst by filtration. The cyrene solution is refrigerated for crystallization. The product is

filtered, washed with water and dried under vacuum. The product was obtained as a white solid.

### (c) General Procedure for the synthesis of 4-arylamino-1,2-naphthoquinones (7)

Lawsonone (1 mmol) and amine (1.2 mmol) was incorporated in the HMDBS eutectogel by ether co-gelation method or cast on gel surface method. In cast on gel surface method, a complete permeation of reactant was achieved after 12h at room temperature. After incorporation of reactants, the gel vial is irradiated under blue LED for about 24 h. In order follow the reaction progress, a small piece of gel is taken, dispersed in DCM and analyzed with TCL. After completion of the reaction, the gel is placed in chloroform or hexane-chloroform or chloroform-methanol mixture to extract the product, this process is repeated 3 times. The extracted mixture is evaporated under vacuum. Brown product thus obtained is crystallized in a mixture of solvents (Hexane-Ethylacetate; Chloroform-Methanol, or a suitable solvents) and directly subjected to NMR analysis. Column chromatography is not performed..

### 3 Optimization studies

**Table S1:** Optimization studies for 4-arylamino-1,2-naphthoquinones using conventional method

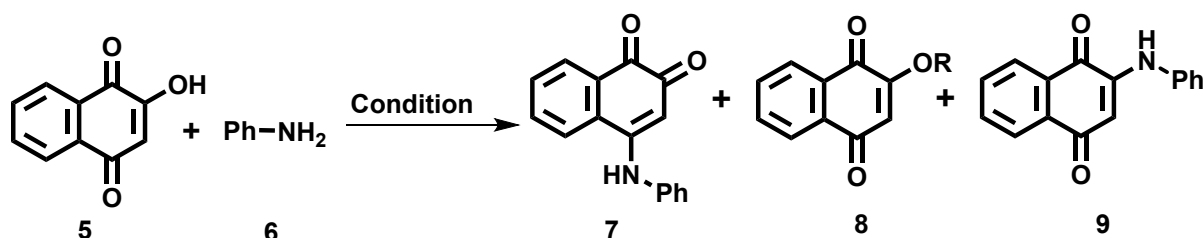

| S.No | Catalyst          | Condition | Solvent               | Time (h) | 7 (%)  | 8 (%) | 9 (%)  | observation            |
|------|-------------------|-----------|-----------------------|----------|--------|-------|--------|------------------------|
| 1.   | pTSA              | Reflux    | MeOH                  | 24       | -      | 12    | 45     | Isolated as a mixture  |
| 2.   | TFA               | Reflux    | MeOH                  | 12       | traces | 21    | 42     | Isolated as a mixture  |
| 3.   | CuSO <sub>4</sub> | Reflux    | MeOH/EtOH/BuOH, iPrOH | 24       | traces | 57    | traces | Isolated as a mixture* |

|    |                   |        |      |    |        |        |        |                |
|----|-------------------|--------|------|----|--------|--------|--------|----------------|
| 4. | ZnSO <sub>4</sub> | Reflux | MeOH | 48 | traces | traces | traces | -\$            |
| 5. | MgSO <sub>4</sub> | Reflux | MeOH | 48 | -      | -      | -      | -\$            |
| 6. | No catalyst       | Reflux | MeOH | 24 | 13     | 52     | 32     | Isolated yield |
| 9. | CuSO <sub>4</sub> | Reflux | BuOH | 48 |        |        |        | 98             |

\* among all protic solvents MeOH rendered maximum yield, and hence yield mentioned are for MeOH in entry 3. \$ multiple spots were observed in TLC and starting materials are not consumed completely even after prolonged reaction. 5 and 6a (1 mmol) were used as model substrate for the conventional reaction.

## 4 Characterization studies

### Compound 1: 4-hydroxymethyl benzaldehyde

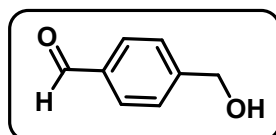

The product was obtained as a colour less liquid with 70% yield

<sup>1</sup>H NMR (400 MHz, CDCl<sub>3</sub>) δ: 9.86 (d, *J* = 1.6 Hz, 1H, OH), 7.74 (d, *J* = 7.9 Hz, 2H, Ar-H), 7.41 (d, *J* = 7.9 Hz, 2H, Ar-H), 4.68 (s, 2H, Ar-CH<sub>2</sub>).

### Compound 2: 4-(hydroxymethyl)-1,3:2,4-dibenzylidene-D-sorbitol

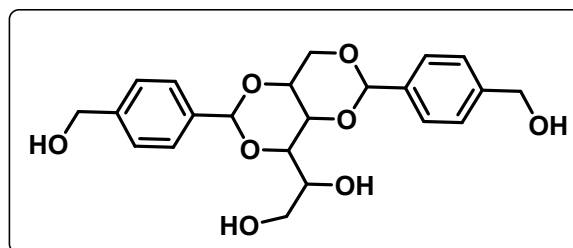

The product was obtained as a white solid with 86% yield

<sup>1</sup>H NMR (400 MHz, DMSO-*d*<sub>6</sub>) δ: 7.41 (t, *J* = 8.1 Hz, 4H, Ar-H), 7.31 (dd, *J* = 8.1, 1.6 Hz, 4H, Ar-H), 5.64 (s, 2H, acetal-H), 5.21 (s, 2H, benzylic-OH), 4.83 (s, 1H, Sac-H), 4.50 (s, 4H, Ar-CH<sub>2</sub>), 4.21 – 4.11 (m, 3H, Sac-H), 3.93 (d, *J* = 1.7 Hz, 1H, Sac-H), 3.83 (dd, *J* = 9.2, 1.7 Hz, 1H, Sac-H), 3.76 (d, *J* = 6.4 Hz, 1H, Sac-H), 3.59 (dd, *J* = 11.3, 2.3 Hz, 1H, Sac-H), 3.43 (dd, *J* = 11.2, 5.1 Hz, 2H, Sac-H).

<sup>13</sup>C NMR (100 MHz, DMSO-*d*<sub>6</sub>) δ: 143.39, 143.29, 137.64, 137.38, 126.40, 126.38, 126.36, 126.34, 99.84, 99.78, 78.20, 78.12, 70.55, 69.78, 68.89, 68.20, 63.12.

**HRMS (ESI, m/z):** C<sub>22</sub>H<sub>26</sub>O<sub>8</sub>, [M+H]<sup>+</sup> Calculated: 419.1706; [M+H]<sup>+</sup> found: 419.1704.

**Compound 7a: 4-(phenylamino)-naphthalene-1,2-dione**

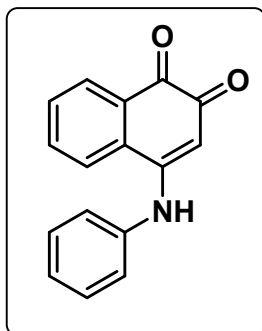

The product was obtained as a brown solid with a 92% yield.

**<sup>1</sup>H NMR (400 MHz, CDCl<sub>3</sub>) δ:** 8.05 (t, *J* = 6.3 Hz, 2H, Ar-H), 7.69 (t, *J* = 7.6 Hz, 1H, Ar-H), 7.63 – 7.57 (m, 1H, Ar-H), 7.50 (s, 1H, NH), 7.35 (t, *J* = 7.8 Hz, 2H, Ar-H), 7.21 (dd, *J* = 8.0 Hz, 2H, Ar-H), 7.15 (t, *J* = 7.4 Hz, 1H Ar-H), 6.35 (s, 1H, Olefin-H). <sup>13</sup>C

**NMR (100 MHz, CDCl<sub>3</sub>) δ:** 183.97, 182.09, 144.75, 137.45, 134.95, 133.24, 132.38, 130.38, 129.72, 126.55, 126.19, 125.65, 122.64, 103.41.

**HRMS(ESI m/z):**

C<sub>16</sub>H<sub>11</sub>NO<sub>2</sub>, [M+H]<sup>+</sup> Calculated: 250.0868, [M+H]<sup>+</sup> Found: 250.0869.

**Compound 7b: 4-(p-tolylamino)naphthalene-1,2-dione**

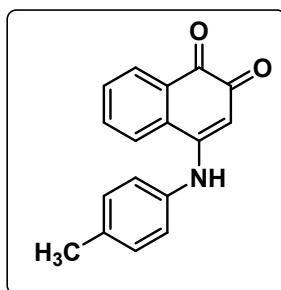

The product was obtained as a brown solid with a 88% yield.

**<sup>1</sup>H NMR (400 MHz, CDCl<sub>3</sub>) δ:** 8.10 (m, *J* = 7.6, 3.0, 1.3 Hz, 2H, Ar-H), 7.75 (td, *J* = 7.6, 1.3 Hz, 1H, Ar-H), 7.65 (td, *J* = 7.5, 1.4 Hz, 1H, Ar-H), 7.52 (s, 1H, NH), 7.22 (d, *J* = 8.2 Hz, 2H, Ar-H), 7.16 (d, *J* = 8.4 Hz, 2H, Ar-H), 6.35 (s, 1H, Olefin-H), 2.36 (s, 3H, Ar-CH<sub>3</sub>).

**<sup>13</sup>C NMR (100 MHz, CDCl<sub>3</sub>) δ:** 183.86, 182.16, 145.07, 135.66, 134.89, 134.77, 133.34, 132.26, 130.42, 130.25, 126.49, 126.16, 122.75, 103.04, 20.99.

**Compound 7c: 4-((4-methoxyphenyl)amino)naphthalene-1,2-dione**

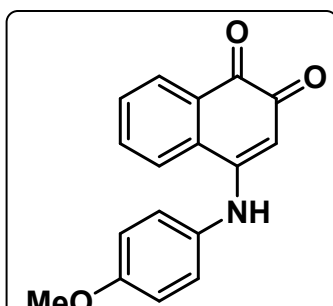

The product was obtained as a brown solid with a 86% yield.

**<sup>1</sup>H NMR (400 MHz, CDCl<sub>3</sub>) δ:** 8.11 (m, *J* = 7.6, 4.0, 1.3 Hz, 2H, Ar-H), 7.75 (td, *J* = 7.5, 1.4 Hz, 1H, Ar-H), 7.66 (td, *J* = 7.5, 1.4 Hz, 1H, Ar-H), 7.44 (s, 1H, NH), 7.20 (d, *J* = 8.9 Hz, 2H, Ar-H), 6.95 (d, *J* = 9.0 Hz, 2H, Ar-H), 6.22 (s, 1H, Olefin-H), 3.83 (s, 3H, O-CH<sub>3</sub>).

**<sup>13</sup>C NMR (100 MHz, CDCl<sub>3</sub>) δ:** 183.75, 182.19, 157.70, 145.70, 134.89, 133.42, 132.21, 130.44, 130.04, 126.45, 126.16, 124.87, 114.93, 102.55, 55.58.

**Compound 7d: 4-((4-aminophenyl)amino)naphthalene-1,2-dione**

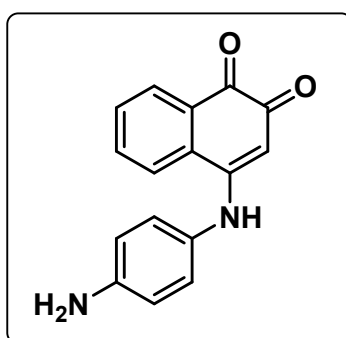

**<sup>1</sup>H NMR (400 MHz, DMSO-*d*<sub>6</sub>) δ:** 9.03 (s, 1H, NH), 8.09 (d, *J* = 7.5 Hz, 1H, Ar-H), 7.99 (d, *J* = 7.5 Hz, 1H, Ar-H), 7.89 (t, *J* = 7.6 Hz, 1H, Ar-H), 7.81 (t, *J* = 7.5 Hz, 1H, Ar-H), 7.07 (d, *J* = 8.7 Hz, 2H, Ar-H), 6.68 (d, *J* = 8.7 Hz, 2H, Ar-H), 5.91 (s, 1H, Olefin-H), 5.28 (s, 2H, NH<sub>2</sub>).

**<sup>13</sup>C NMR (100 MHz, DMSO-*d*<sub>6</sub>) δ:** 182.36, 147.64, 135.20, 133.66, 132.65, 131.05, 130.44, 126.41, 125.70, 122.53, 119.77, 114.92, 101.27.

**HRMS(ESI *m/z*):** C<sub>16</sub>H<sub>12</sub>N<sub>2</sub>O<sub>2</sub>, [M+H]<sup>+</sup> Calculated: 265.0977, [M+H]<sup>+</sup> Found: 265.0979.

**Compound 7e: 4-((4-chlorophenyl)amino)naphthalene-1,2-dione**

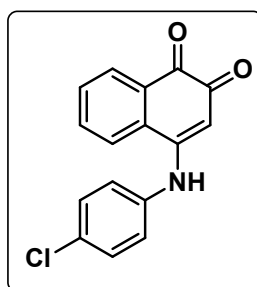

The product was obtained as a brown solid with a 91% yield.

**<sup>1</sup>H NMR (400 MHz, CDCl<sub>3</sub>) δ:** 8.13 (d, *J* = 8.2 Hz, 2H, Ar-H), 7.78 (s, 1H, Ar-H), 7.69 (s, 1H, Ar-H), 7.52 (s, 1H, NH), 7.40 (d, *J* = 8.1 Hz, 2H, Ar-H), 7.27 – 7.17 (m, 2H, Ar-H), 6.37 (s, 1H, Olefin-H).

**<sup>13</sup>C NMR (100 MHz, CDCl<sub>3</sub>+DMSO-*d*<sub>6</sub>) δ:** 183.26, 181.85, 146.09, 137.37, 135.01, 133.03, 132.76, 130.77, 129.73, 129.49, 126.47, 125.73, 125.28, 103.03.

**HRMS(ESI *m/z*):** C<sub>16</sub>H<sub>10</sub>ClNO<sub>2</sub>, [M+H]<sup>+</sup> Calculated: 284.0478, [M+H]<sup>+</sup> Found: 284.0477.

**Compound 7f: 4-((3-chlorophenyl)amino)naphthalene-1,2-dione**

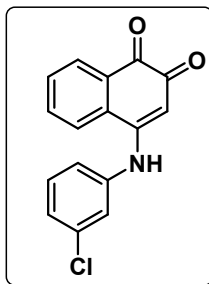

The product was obtained as a brown solid with a 93% yield.

**<sup>1</sup>H NMR (400 MHz, CDCl<sub>3</sub>) δ:** 8.05 (m, *J* = 7.5, 4.9, 1.3 Hz, 2H, Ar-H), 7.71 (td, *J* = 7.6, 1.4 Hz, 1H, Ar-H), 7.62 (td, *J* = 7.6, 1.4 Hz, 1H, Ar-H), 7.47 (s, 1H, NH), 7.28 (t, *J* = 8.0 Hz, 1H, Ar-H), 7.22 (t, *J* = 2.1 Hz, 1H, Ar-H), 7.14 – 7.09 (m, 2H, Ar-H), 6.36 (s, 1H, Olefin-H).

**<sup>13</sup>C NMR (100 MHz, CDCl<sub>3</sub>+DMSO-*d*<sub>6</sub>) δ:** 181.72, 134.81, 132.96, 132.55, 130.59, 126.48, 125.79, 125.17, 124.06, 123.21, 122.27, 103.55.

**HRMS(ESI *m/z*):** C<sub>16</sub>H<sub>10</sub>ClNO<sub>2</sub>, [M+H]<sup>+</sup> Calculated: 284.0475, [M+H]<sup>+</sup> Found: 284.0477.

**Compound 7g: 4-((4-fluorophenyl)amino)naphthalene-1,2-dione**

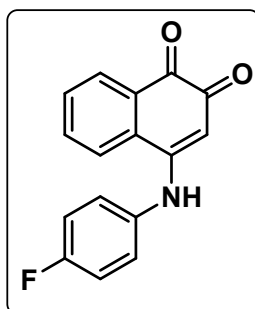

The product was obtained as a brown solid with a 84% yield.



**<sup>1</sup>H NMR (400 MHz, CDCl<sub>3</sub>) δ:** 8.11 (t, *J* = 7.0 Hz, 2H, Ar-H), 7.72 (dt, *J* = 36.7, 7.5 Hz, 2H, Ar-H), 7.46 (s, 1H, NH), 7.29 – 7.22 (m, 2H, Ar-H), 7.13 (t, *J* = 8.4 Hz, 2H, Ar-H), 6.25 (s, 1H, Olefin-H).

**<sup>13</sup>C NMR (100 MHz, CDCl<sub>3</sub>) δ:** 183.86, 181.97, 145.32, 135.00, 133.22, 132.43, 130.36, 126.55, 126.24, 125.07, 124.99, 116.77, 116.55, 103.14.

**Compound 7h: 4-((2,4-dimethylphenyl)amino)naphthalene-1,2-dione**

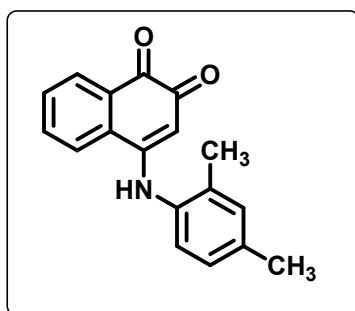

The product was obtained as a brown solid with a 90% yield.

**<sup>1</sup>H NMR (400 MHz, CDCl<sub>3</sub>) δ:** 8.11 (m, *J* = 9.4, 7.7, 1.0 Hz, 2H, Ar-H), 7.75 (td, *J* = 7.5, 1.3 Hz, 1H, Ar-H), 7.66 (td, *J* = 7.5, 1.3 Hz, 1H, Ar-H), 7.27 (s, 1H, NH), 7.17 – 7.04 (m, 3H, Ar-H), 5.90 (s, 1H, Olefin-H), 2.34 (s, 3H, Ar-CH<sub>3</sub>), 2.24 (s, 3H, Ar-CH<sub>3</sub>).

**<sup>13</sup>C NMR (100 MHz, CDCl<sub>3</sub>) δ:** 183.71, 182.24, 146.16, 136.90, 134.87, 133.49, 133.13, 132.70, 132.20, 132.05, 130.53, 127.74, 126.39, 126.18, 124.93, 102.90, 20.99, 17.67.

**Compound 7i: 4-((2,4,6-trimethylphenyl)amino)naphthalene-1,2-dione**

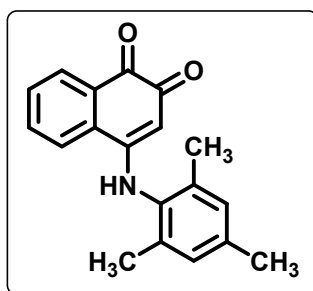

The product was obtained as a brown solid with a 92% yield.

**<sup>1</sup>H NMR (400 MHz, CDCl<sub>3</sub>) δ:** 8.15 – 8.07 (m, 2H, Ar-H), 7.74 (d, *J* = 1.3 Hz, 1H, Ar-H), 7.66 (td, *J* = 7.5, 1.2 Hz, 1H, Ar-H), 7.04 (s, 1H, NH), 6.95 (s, 2H, Ar-H), 5.38 (s, 1H, Olefin-H), 2.31 (s, 3H, Ar-CH<sub>3</sub>), 2.16 (s, 6H, Ar-CH<sub>3</sub>).

**<sup>13</sup>C NMR (100 MHz, CDCl<sub>3</sub>) δ:** 183.51, 182.10, 146.92, 137.93, 135.43, 134.82, 133.65, 132.13, 130.92, 130.69, 129.48, 126.30, 126.21, 102.66, 20.96, 17.92.

**Compound 7j: 4-((2-methoxyphenyl)amino)naphthalene-1,2-dione**

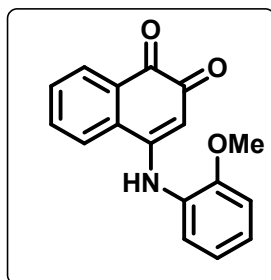

The product was obtained as a brown solid with a 86% yield.

**<sup>1</sup>H NMR (400 MHz, CDCl<sub>3</sub>) δ:** 8.13 (s, 2H, Ar-H), 7.72 (dt, *J* = 36.5, 7.0 Hz, 2H, Ar-H), 7.49 – 7.39 (m, 1H, Ar-H), 7.22 – 7.11 (m, 1H, Ar-H), 7.01 (dt, *J* = 13.2, 5.7 Hz, 2H, Ar-H), 6.48 (s, 1H, Olefin-H), 3.91 (s, 3H, Ar-OCH<sub>3</sub>).

**<sup>13</sup>C NMR (100 MHz, CDCl<sub>3</sub>) δ:** 184.00, 182.14, 151.18, 143.99, 134.78, 133.33, 132.30, 126.98, 126.54, 126.13, 125.48, 121.08, 120.92, 111.17, 103.63, 55.78.

**Compound 7k: 4-((2-hydroxyphenyl)amino)naphthalene-1,2-dione**

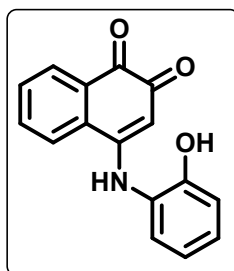

The product was obtained as a brown solid with a 62% yield.

**<sup>1</sup>H NMR (400 MHz, CDCl<sub>3</sub>+DMSO) δ:** 9.65 (s, 1H, NH), 8.15 – 8.03 (m, 3H, Ar-H), 7.81 – 7.73 (m, 1H, NH), 7.71 – 7.65 (m, 1H, Ar-H), 7.33 (d, *J* = 7.1 Hz, 1H, Ar-H), 7.07 – 6.97 (m, 2H, Ar-H), 6.93 – 6.85 (m, 1H Ar-H), 6.29 (s, 1H, Olefin-H).

**<sup>13</sup>C NMR (100 MHz, CDCl<sub>3</sub>+DMSO) δ:** 183.52, 181.97, 149.92, 144.70, 134.72, 133.29, 132.27, 130.55, 126.40, 126.04, 125.83, 125.51, 122.17, 119.71, 116.32, 102.93.

**Compound 7l: 4-((3,4-ethylenedioxyphenyl)amino)naphthalene-1,2-dione**

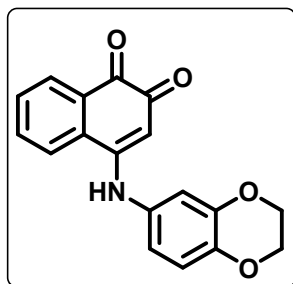

The product was obtained as a brown solid with a 75% yield.

**$^1\text{H}$  NMR (400 MHz,  $\text{CDCl}_3$ )  $\delta$ :** 8.10 (dt,  $J = 7.5, 1.7$  Hz, 2H, Ar-H), 7.75 (td,  $J = 7.6, 1.3$  Hz, 1H, Ar-H), 7.65 (td,  $J = 7.6, 1.3$  Hz, 1H, Ar-H), 7.40 (s, 1H, NH), 6.89 (d,  $J = 8.6$  Hz, 1H, Ar-H), 6.81 (d,  $J = 2.5$  Hz, 1H, Ar-H), 6.74 (dd,  $J = 8.6, 2.5$  Hz, 1H, Ar-H), 6.29 (s, 1H, Olefin-H), 4.28 (s, 4H, Ar-O-CH<sub>2</sub>).

**$^{13}\text{C}$  NMR (100 MHz,  $\text{CDCl}_3$ )  $\delta$ :** 183.78, 182.11, 145.38, 144.07, 141.75, 134.86, 133.35, 132.22, 130.72, 130.42, 126.45, 126.13, 118.02, 116.58, 112.47, 102.89, 64.41, 64.33.

**Compound 8a: 2-methoxynaphthalene-1,4-dione**

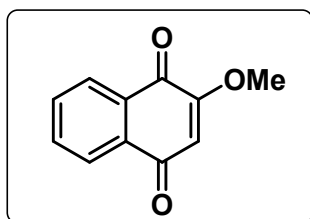

The product was obtained as a brown solid with a 92% yield.

**$^1\text{H}$  NMR (400 MHz,  $\text{CDCl}_3 + \text{DMSO}-d_6$ )  $\delta$ :** 8.00 (dd,  $J = 17.0, 7.1$  Hz, 2H, Ar-H), 7.70 (m,  $J = 7.5$  Hz, 2H, Ar-H), 6.16 (s, 1H, Olefin-H), 3.85 (s, 3H, O-CH<sub>3</sub>).

**$^{13}\text{C}$  NMR (100 MHz,  $\text{CDCl}_3 + \text{DMSO}-d_6$ )  $\delta$ :** 184.58, 179.95, 160.39, 134.39, 133.40, 131.95, 130.98, 126.49, 126.00, 109.95, 56.52.

**HRMS(ESI m/z):** C<sub>11</sub>H<sub>18</sub>O<sub>3</sub>, [M+H]<sup>+</sup> Calculated: 189.0551, [M+H]<sup>+</sup> Found: 189.0559.

**Compound 8b: 2-ethoxynaphthalene-1,4-dione**

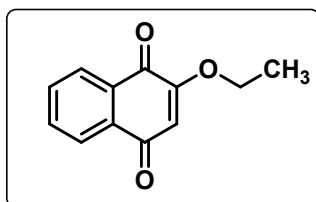

The product was obtained as a brown solid with a 80% yield.

**<sup>1</sup>H NMR (400 MHz, CDCl<sub>3</sub>) δ:** 8.08 – 7.99 (m, 2H, Ar-H), 7.70 – 7.61 (m, 2H, Ar-H), 6.08 (s, 1H, Olefin-H), 4.03 (q, *J* = 7.0 Hz, 2H, O-CH<sub>2</sub>), 1.46 (t, *J* = 7.0 Hz, 3H, CH<sub>3</sub>).

**<sup>13</sup>C NMR (100 MHz, CDCl<sub>3</sub>) δ:** 185.08, 180.21, 159.72, 134.25, 133.28, 132.01, 131.15, 126.71, 126.12, 110.21, 65.35, 13.93.

**HRMS(ESI *m/z*):** C<sub>12</sub>H<sub>10</sub>O<sub>3</sub>, [M+H]<sup>+</sup> Calculated: 203.0708, [M+H]<sup>+</sup> Found: 203.0708.

**Compound 8c: 2-isopropoxynaphthalene-1,4-dione**

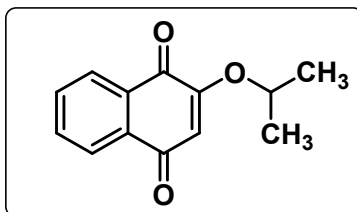

The product was obtained as a brown solid with a 78% yield.

**<sup>1</sup>H NMR (400 MHz, CDCl<sub>3</sub>) δ:** 8.03 (m, *J* = 16.8, 7.2, 1.1 Hz, 2H, Ar-H), 7.69 – 7.61 (m, 2H, Ar-H), 6.07 (s, 1H, Olefin-H), 4.50 (m, *J* = 6.1 Hz, 1H, O-CH), 1.38 (d, *J* = 6.1 Hz, 6H, CH<sub>3</sub>).

**<sup>13</sup>C NMR (100 MHz, CDCl<sub>3</sub>) δ:** 185.25, 180.53, 158.70, 134.18, 133.21, 131.96, 131.29, 126.70, 126.04, 110.50, 72.46, 21.18.

**Compound 8d: 2-butoxynaphthalene-1,4-dione**

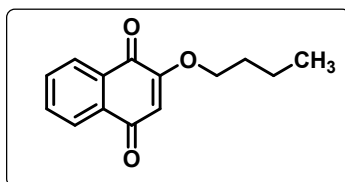

The product was obtained as a brown solid with a 98% yield.

**<sup>1</sup>H NMR (400 MHz, CDCl<sub>3</sub>) δ:** 8.02 (m, *J* = 17.0, 7.2, 1.3 Hz, 2H, Ar-H), 7.69 – 7.60 (m, 2H, Ar-H), 6.08 (s, 1H, Olefin-H), 3.94 (t, *J* = 6.6 Hz, 2H, O-CH<sub>2</sub>), 1.81 (m, *J* = 9.1, 7.8, 6.5 Hz, 2H, alkyl(CH<sub>2</sub>)), 1.50 – 1.38 (m, 2H, Alkyl(CH<sub>2</sub>)), 0.92 (t, *J* = 7.4 Hz, 3H, Alkyl(CH<sub>3</sub>)).

**<sup>13</sup>C NMR (100 MHz, CDCl<sub>3</sub>) δ:** 185.09, 180.16, 159.92, 134.21, 133.25, 132.02, 131.18, 126.66, 126.10, 110.17, 69.38, 30.24, 19.12, 13.70.

**Compound 10: 4-((4-Phenyl-β-D-galactose)amino)naphthalene-1,2-dione**

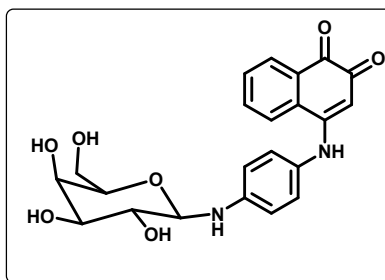

The product was obtained as a brown solid with a 92% yield.

**<sup>1</sup>H NMR (400 MHz, DMSO-*d*<sub>6</sub>) δ:** 9.10 (s, 1H, NH), 8.10 (d, *J* = 7.6 Hz, 1H, Ar-H), 7.99 (d, *J* = 7.6 Hz, 1H, Ar-H), 7.90 (t, *J* = 7.5 Hz, 1H, Ar-H), 7.82 (t, *J* = 7.5 Hz, 1H, Ar-H), 7.16 (d, *J* = 8.5 Hz, 2H, Ar-H), 6.83 (d, *J* = 8.4 Hz, 2H, Ar-H), 5.94 (s, 1H, Olefin-H), 5.37 (dd, *J* = 5.5 Hz, 1H, Sac-H), 5.15 – 4.95 (m, 1H, Sac-H), 4.81 (dd, *J* = 5.4 Hz, 1H, Sac-H), 4.62 (dq, *J* = 13.4, 5.9 Hz, 1H, Sac-H), 4.46 – 4.36 (m, 1H, Sac-H), 3.93 (m, *J* = 6.5, 6.0 Hz, 1H, Sac-H), 3.78 (d, *J* = 3.9 Hz, 1H, Sac-H), 3.53 (s, 2H, Sac-H). **<sup>13</sup>C**

**NMR (100 MHz, DMSO-*d*<sub>6</sub>) δ:** 182.29, 147.46, 146.00, 135.34, 133.42, 132.80, 130.92, 127.57, 126.48, 125.70, 125.62, 113.99, 100.95, 86.00, 76.08, 74.78, 70.60, 68.91, 61.05.

**HRMS(ESI *m/z*):** C<sub>22</sub>H<sub>22</sub>N<sub>2</sub>O<sub>7</sub>, [M+H]<sup>+</sup> Calculated : 427.1505, [M+H]<sup>+</sup> Found: 427.1497 .

## 5 Gelation studies

**Table S2:** Gelation studies of HMDBS in various solvents

| S.No | Solvent                    | Gelation (CGC, % (wt/v)) |
|------|----------------------------|--------------------------|
| 1    | Water                      | I                        |
| 2    | Methanol                   | I                        |
| 3    | Ethanol                    | I                        |
| 4    | Glycerol                   | G(0.4)                   |
| 5    | Ethylene glycol            | G(0.6)                   |
| 6    | Tetrahydrofuran            | S                        |
| 7    | Dimethyl sulfoxide         | S                        |
| 8    | Dimethyl sulfoxide + water | G(0.4)                   |

|    |                      |        |
|----|----------------------|--------|
| 9  | Acetone              | I      |
| 10 | 1,4-dioxane          | PS     |
| 11 | Dimethyl formamide   | G(0.6) |
| 12 | Polyethylene glycol  | G(0.5) |
| 13 | Acetic acid          | I      |
| 14 | N-methyl pyrrolidone | I      |
| 15 | 1,2-Dichlorobenzene  | I      |
| 16 | pyridine             | I      |
| 17 | n-Butanol            | G(0.4) |
| 18 | Toulene              | I      |
| 19 | Benzyl alcohol       | G(0.4) |
| 20 | Olive oil            | I      |
| 21 | Linseed oil          | I      |
| 22 | Dimethyl carbonate   | I      |
| 24 | Cyrene               | I      |

*I – Insoluble, G – Gelation, S – solution, PS – Partially soluble*

**Table S3:** Gelation studies of HMDBS in Deep eutectic solvents

| <b>S.NO</b> | <b>Deep Eutectic solvents</b>              | <b>Gelation(CGC wt/v)</b> |
|-------------|--------------------------------------------|---------------------------|
| 1           | Choline Chloride + Ethylene glycol (1:4)   | G(0.3)                    |
| 2           | Choline Chloride + Ethylene glycol (1:3)   | G(0.3)                    |
| 3           | Choline Chloride + Ethylene glycol (1.5:2) | G(1)                      |
| 4           | Choline Chloride + Glycerol (1:4)          | G(0.4)                    |
| 5           | Choline Chloride + Glycerol (1:3)          | G(0.5)                    |
| 6           | Choline Chloride + Glycerol (1.5:2)        | G(1.3)                    |
| 7           | Choline Chloride + Urea (1:4)              | G(0.6)                    |
| 8           | Choline Chloride + Urea (1:3)              | G(0.6)                    |

|    |                                                |                                 |
|----|------------------------------------------------|---------------------------------|
| 9  | Choline Chloride + Urea (1.5:2)                | G(1.5)                          |
| 10 | Choline Chloride + Polyethylene glycol (1:4)   | Dense precipitation is observed |
| 11 | Choline Chloride + Polyethylene glycol (1:3)   | Dense precipitation is observed |
| 12 | Choline Chloride + Polyethylene glycol (1.5:2) | Dense precipitation is observed |

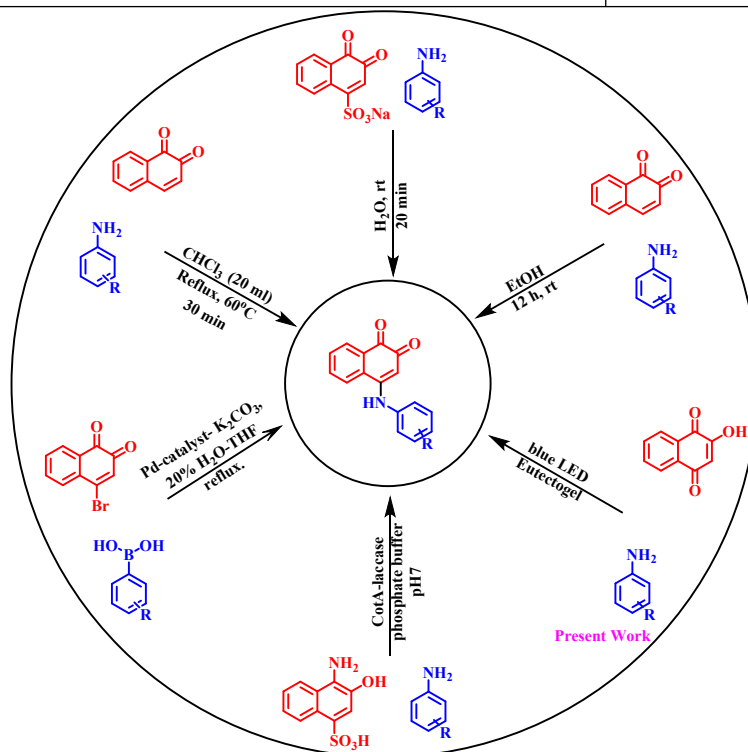

**Figure S1:** Various reaction conditions for the synthesis of 4-arylamino-1,2-naphthoquinones present in literature<sup>1,2,3,4,5,6</sup>

## 6 NMR and HRMS spectra

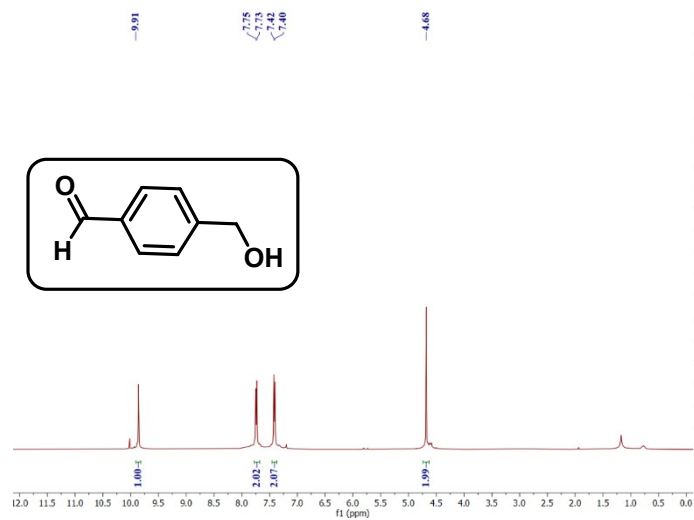

**Figure S2:** <sup>1</sup>H NMR (400MHz) Spectrum of HMBA 2 in CDCl<sub>3</sub> at 28 °C.

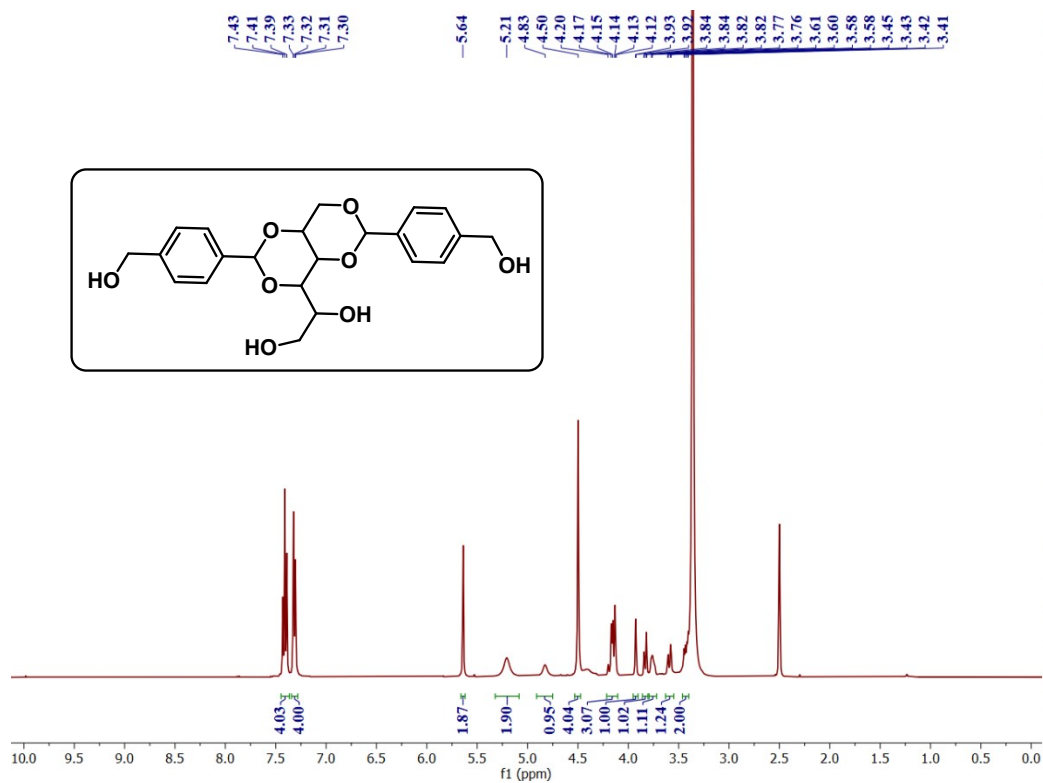

**Figure S3:** <sup>1</sup>H NMR (400MHz) Spectrum of HMDBS 4 in DMSO-*d*<sub>6</sub> at 28 °C.



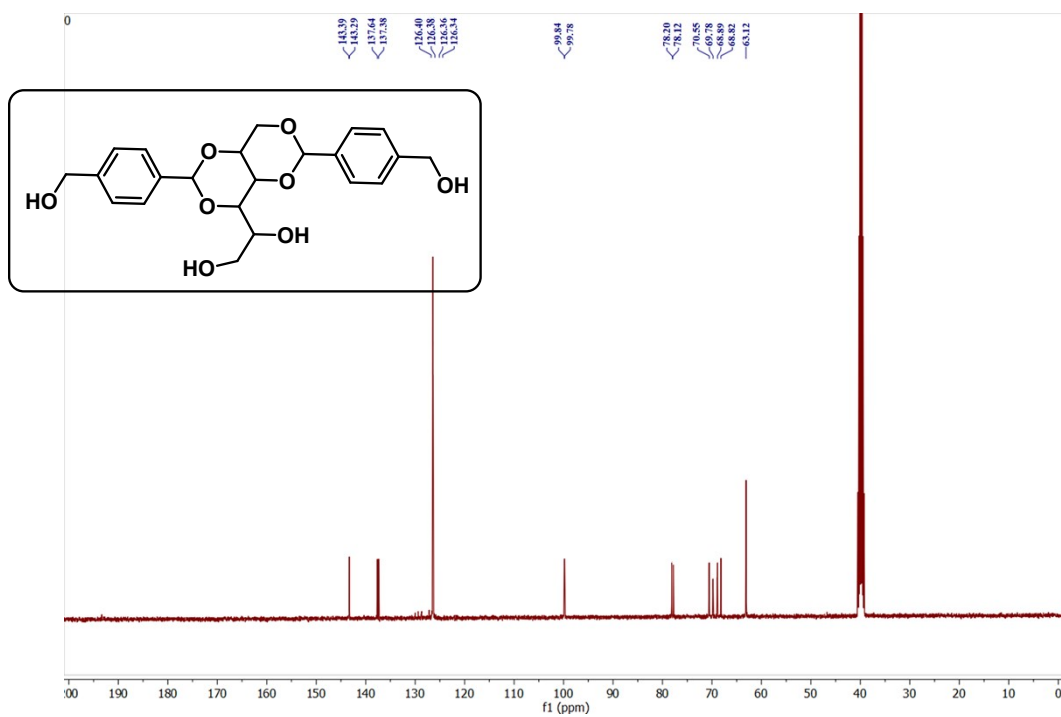

**Figure S4:**  $^{13}\text{C}$  NMR (100 MHz) Spectrum HMDBS 4 in  $\text{DMSO-}d_6$  28 °C.

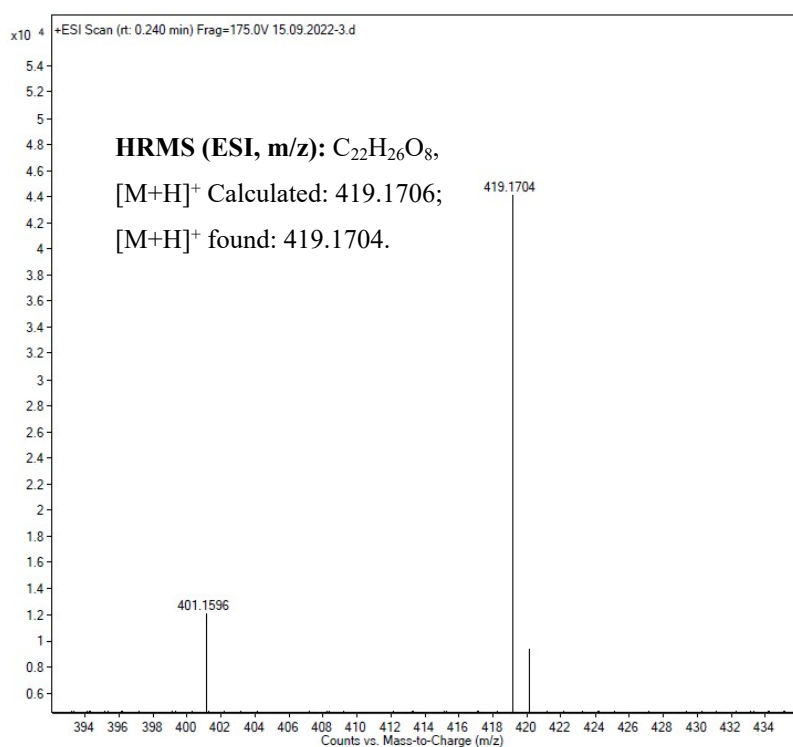

**Figure S5:** HRMS Spectrum of HMDBS 4.

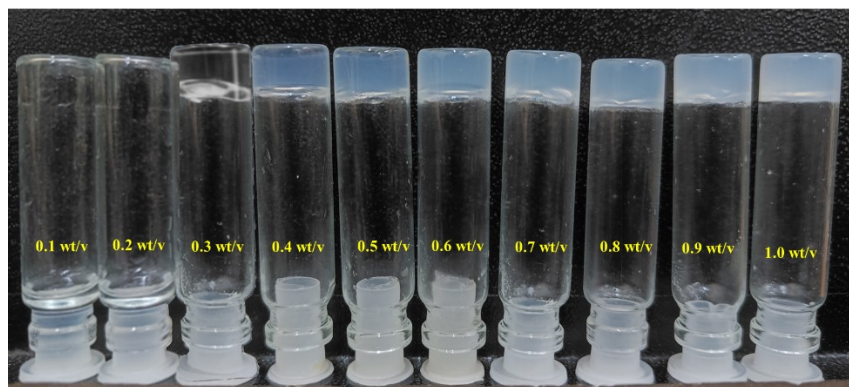

**Figure S6:** Images of gel formed by HMDBS in ChCl:EG (1:3) ratio with increasing gelator concentration in wt/v.

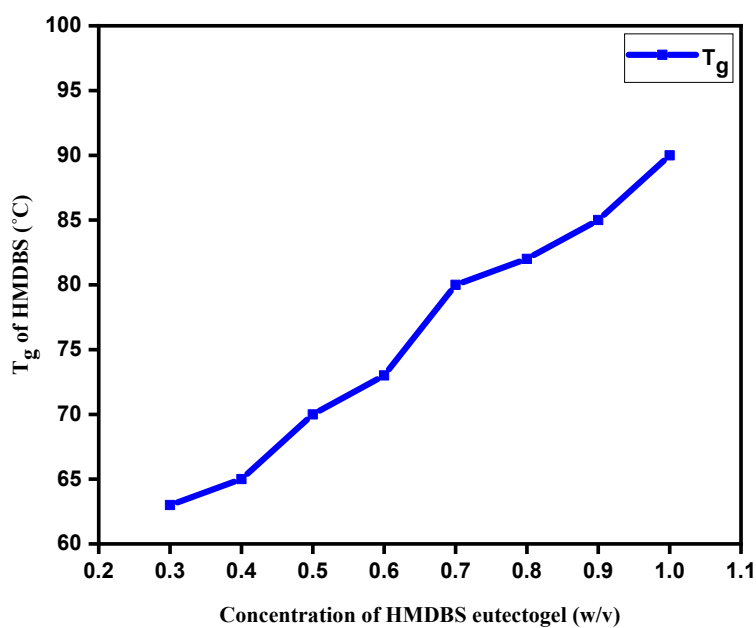

**Figure S7:** Transition temperature ( $T_g$ ) values of HMDBS- ChCl: EG gels determined via reproducible tube inversion experiments.

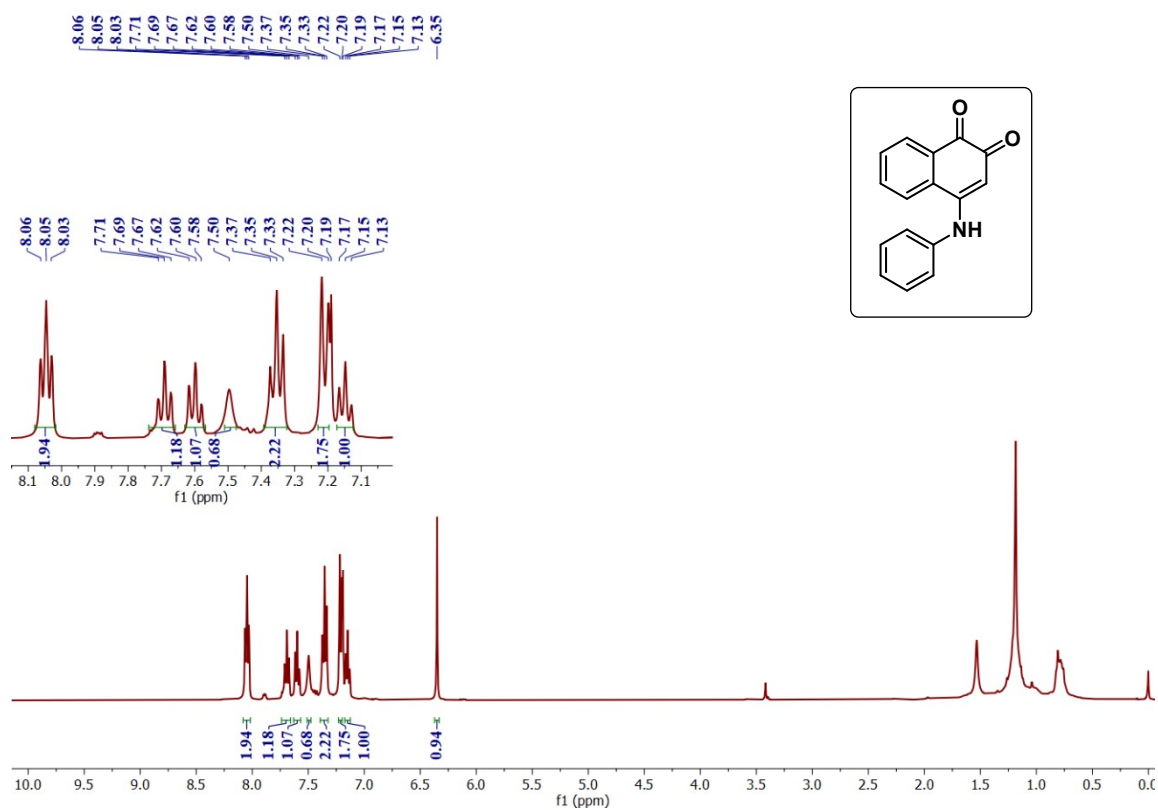

**Figure S8:**  $^1\text{H}$  NMR (400MHz) Spectrum of **7a** in  $\text{CDCl}_3$  at  $28^\circ\text{C}$ .

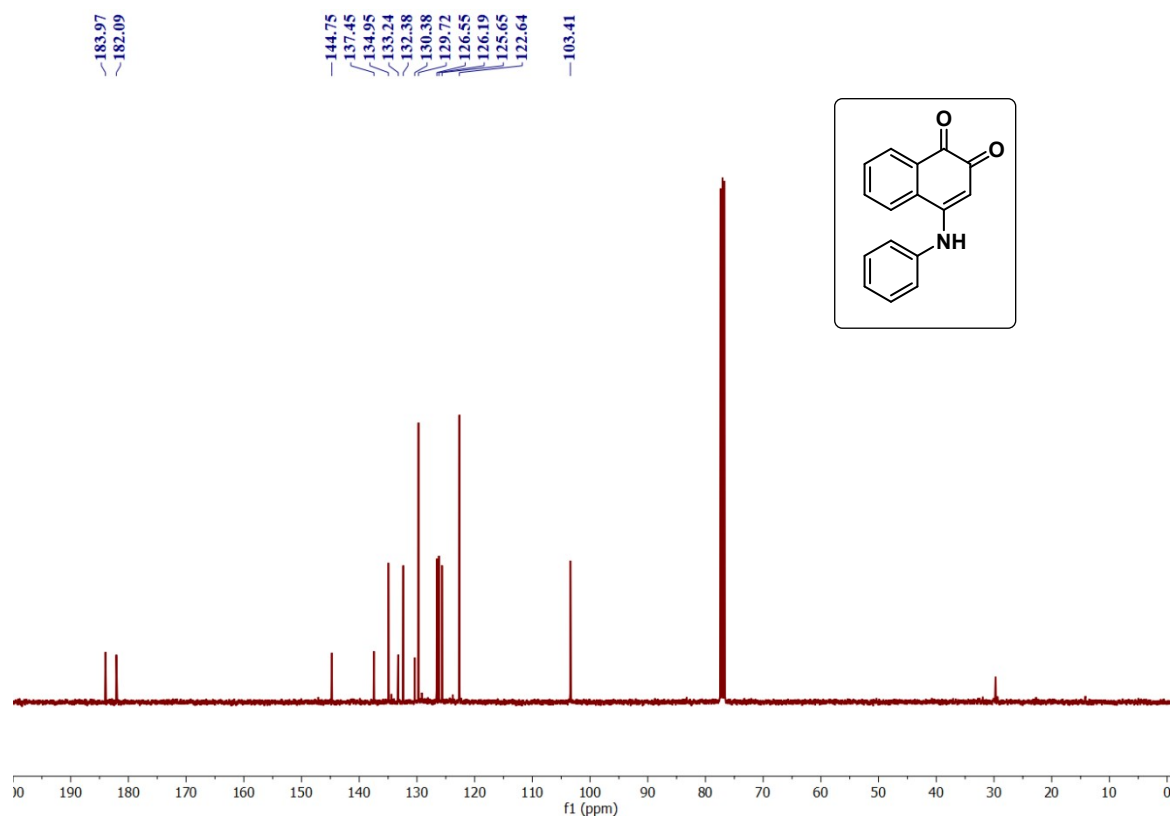

**Figure S9:** <sup>13</sup>C NMR (100 MHz) Spectrum of 7a in CDCl<sub>3</sub> at 28 °C.

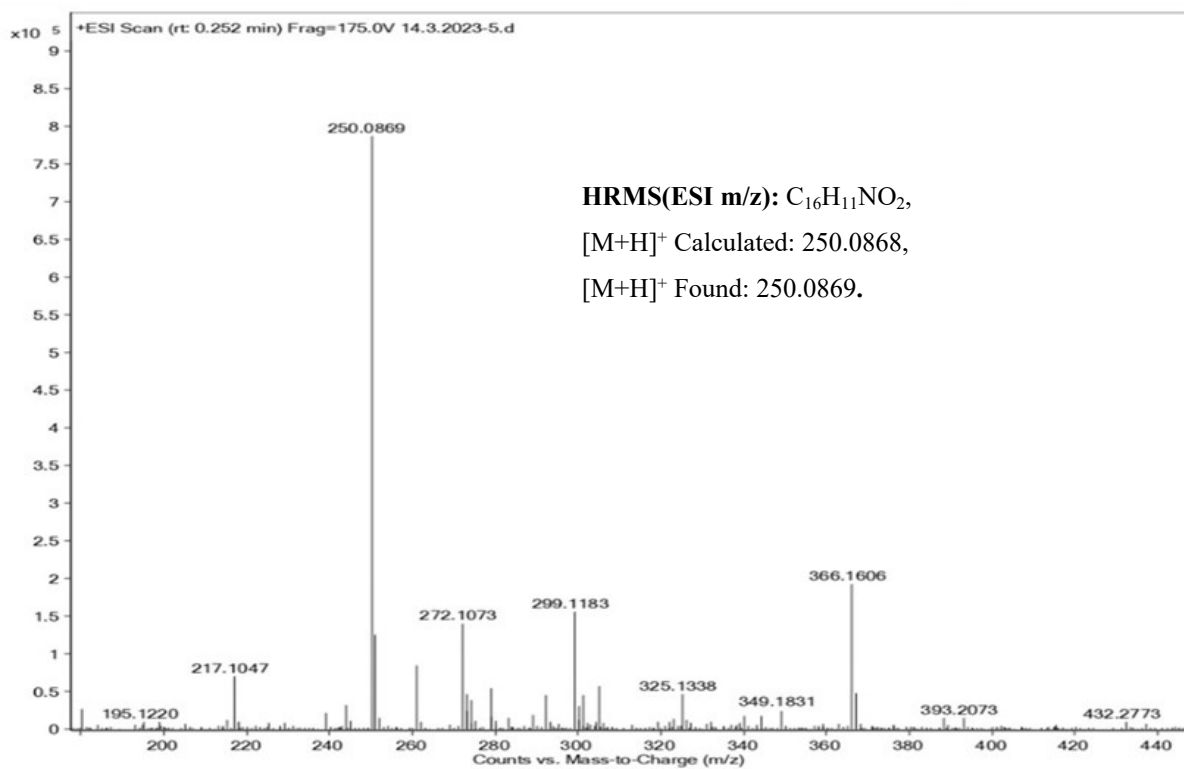

**Figure S10:** HRMS Spectrum of 7a.

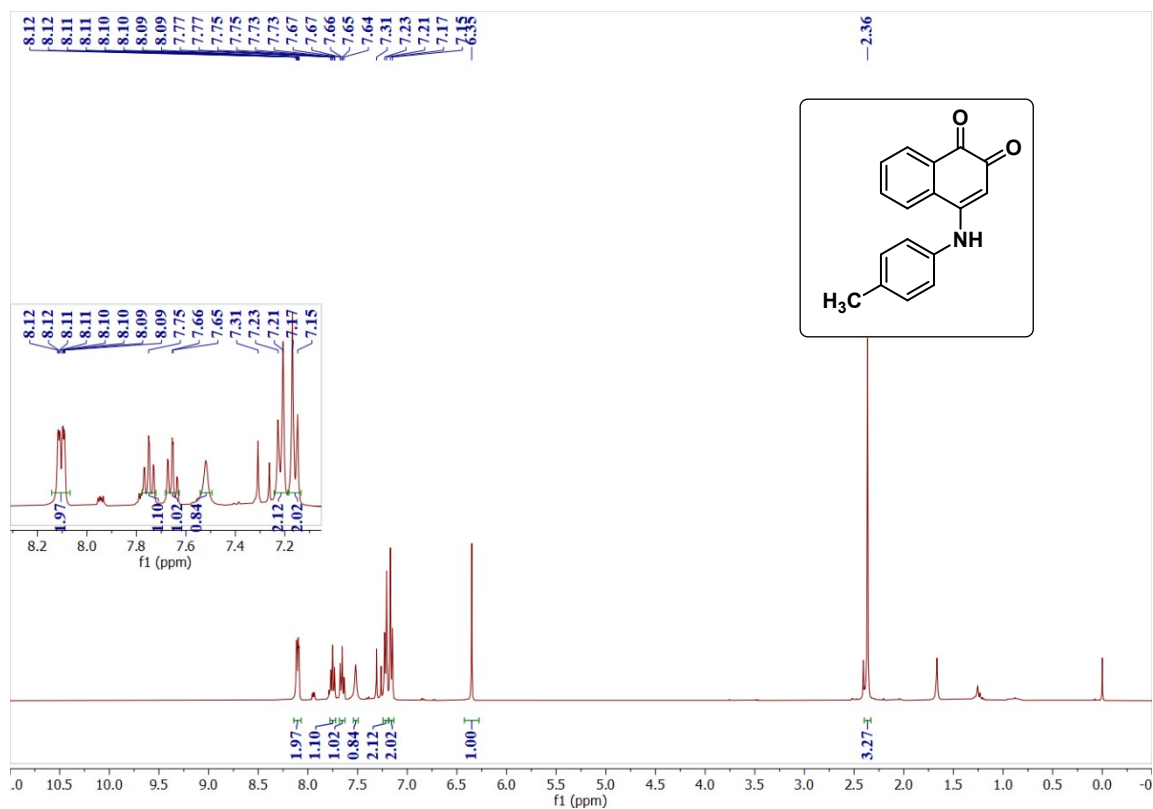

Figure S11: <sup>1</sup>H NMR (400MHz) Spectrum of **7b** in CDCl<sub>3</sub> at 28 °C.

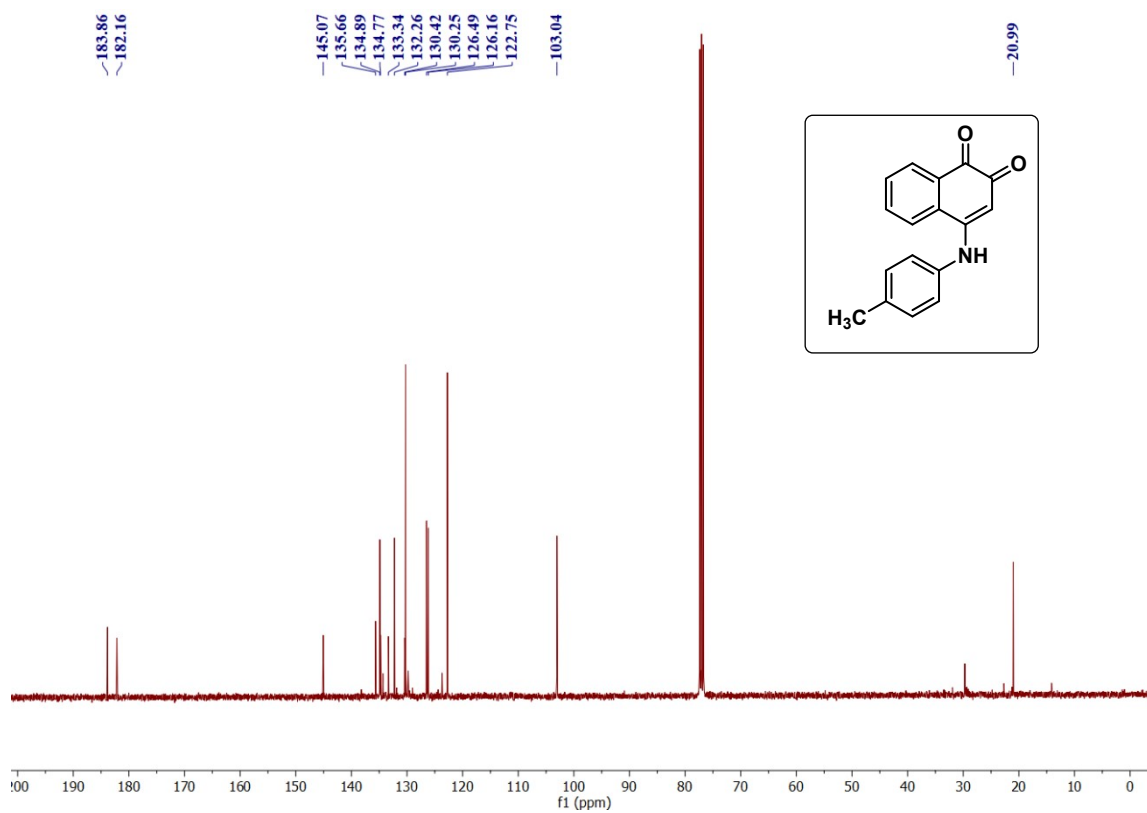

Figure S12: <sup>13</sup>C NMR (100 MHz) Spectrum of **7b** in CDCl<sub>3</sub> at 28 °C.

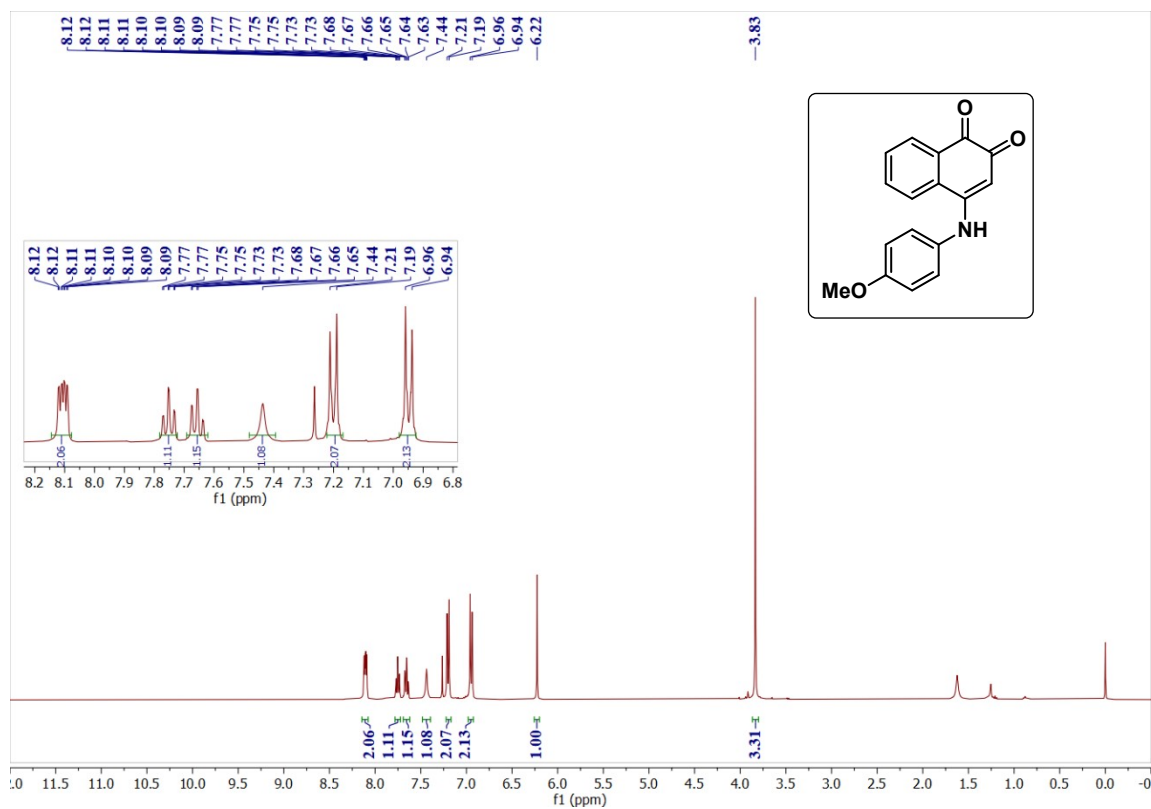

Figure S13: <sup>1</sup>H NMR (400MHz) Spectrum of 7c in CDCl<sub>3</sub> at 28 °C.

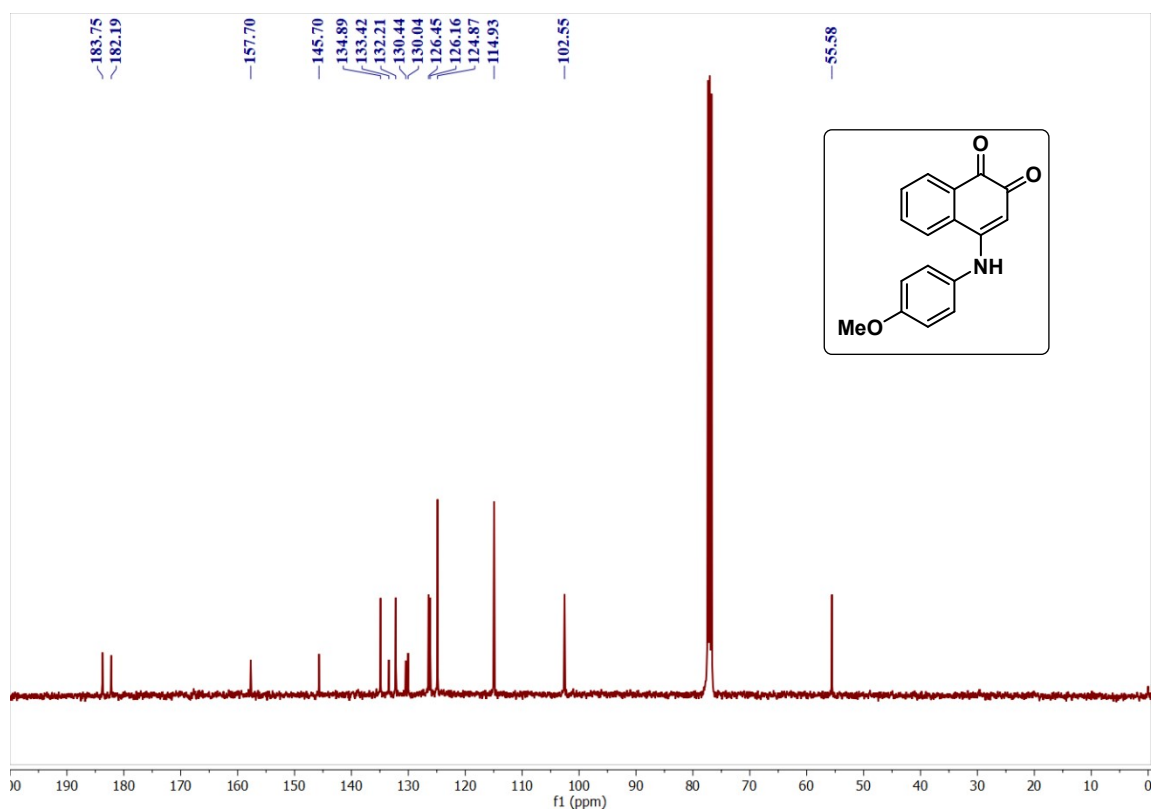

Figure S14: <sup>13</sup>C NMR (100 MHz) Spectrum of 7c in CDCl<sub>3</sub> at 28 °C.

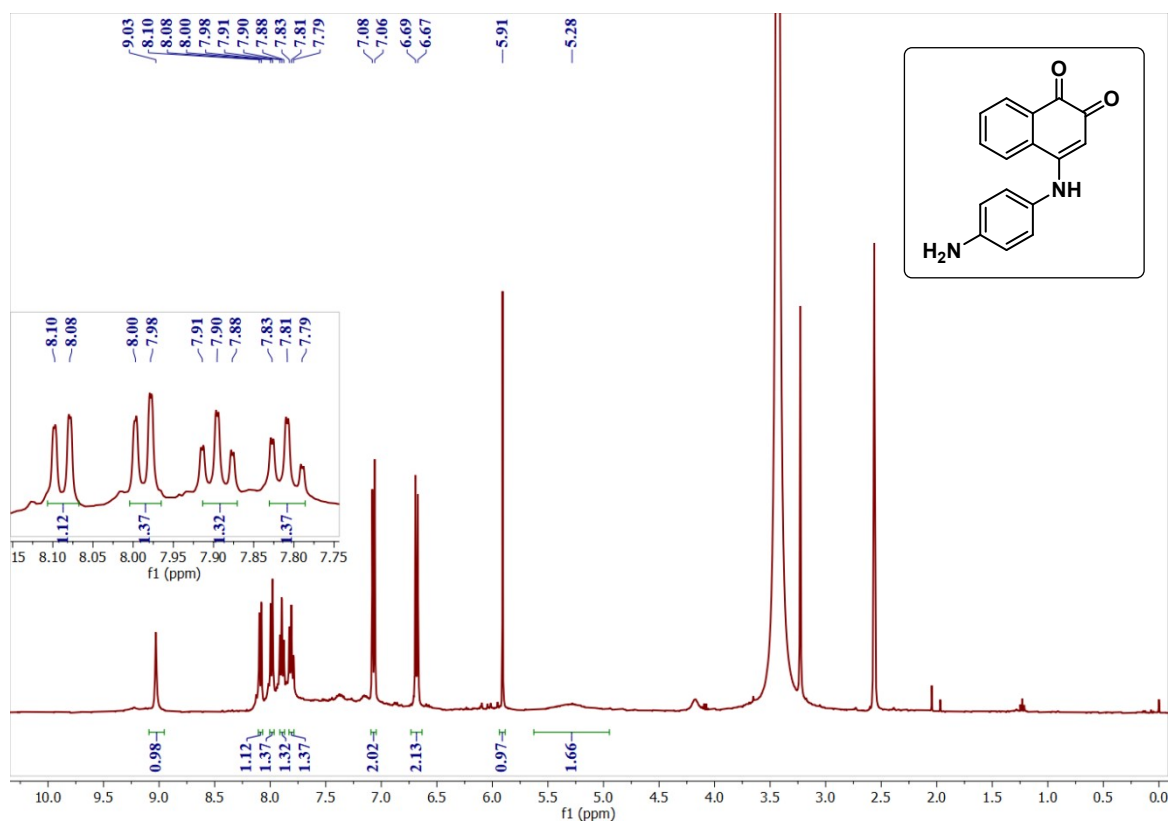

**Figure S15:** <sup>1</sup>H NMR (400MHz) Spectrum of **7d** in DMSO-*d*<sub>6</sub> at 80 °C.

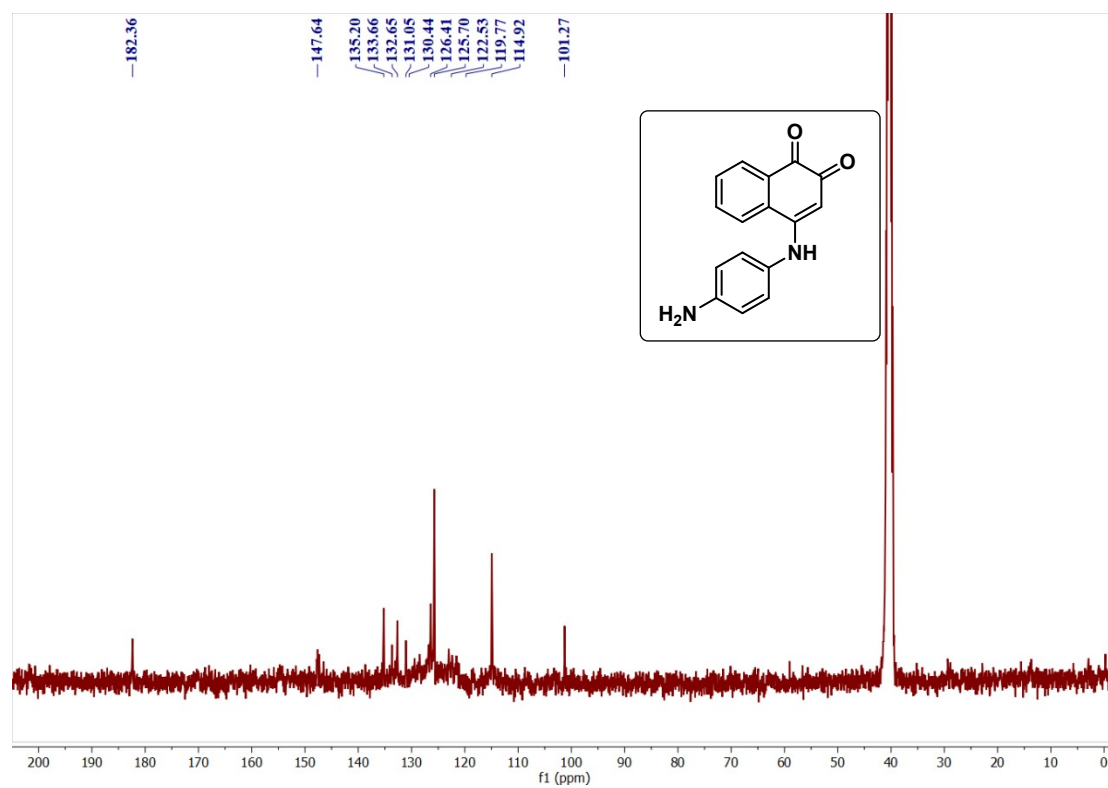

**Figure S16:** <sup>13</sup>C NMR (100 MHz) Spectrum of **7d** in DMSO-*d*<sub>6</sub> at 80 °C.

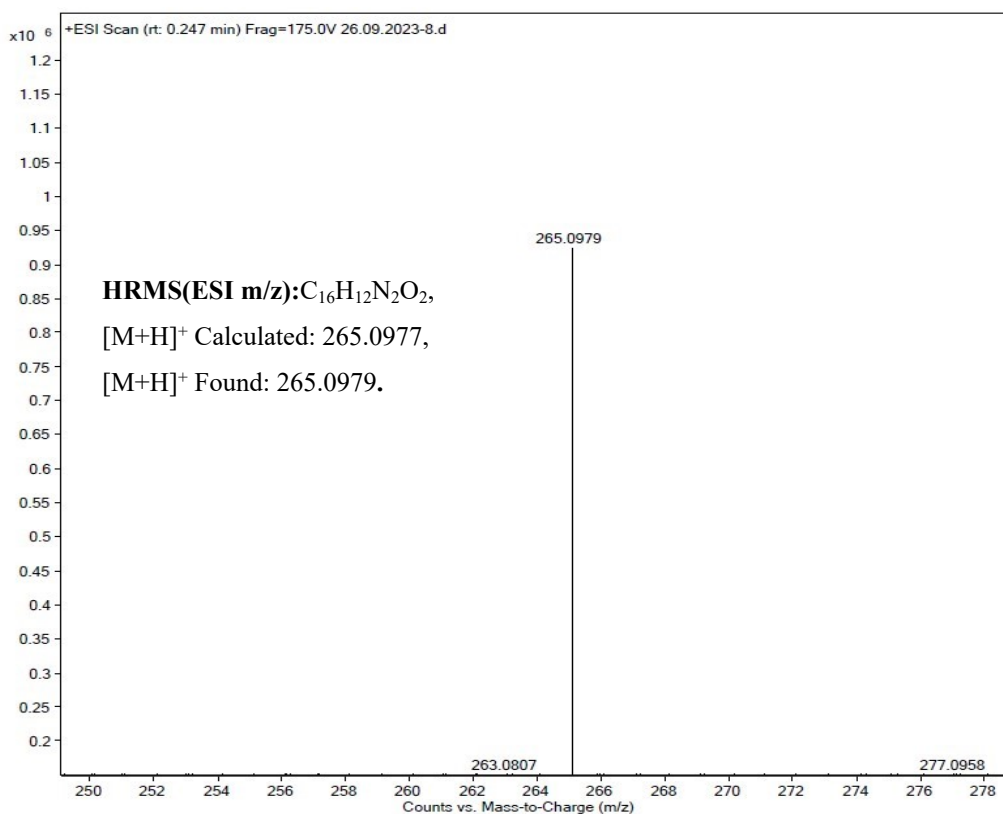

Figure S17: HRMS Spectrum of 7d.

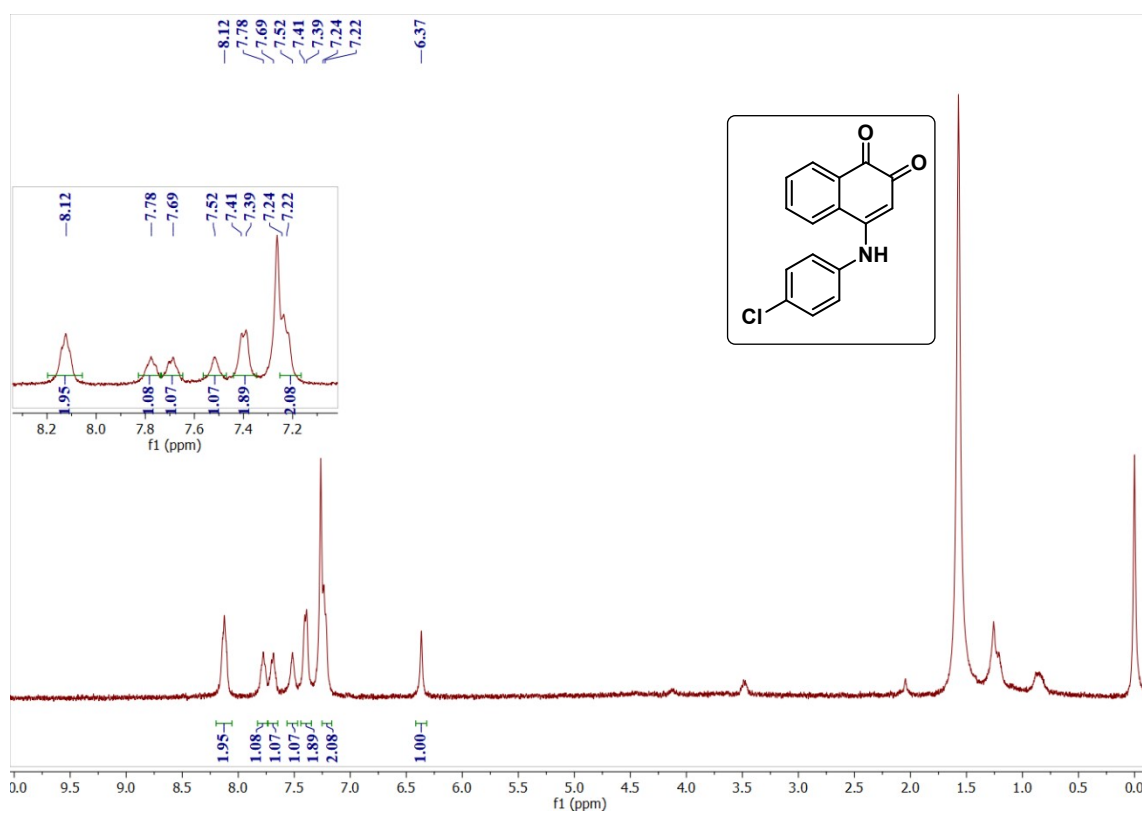

Figure S18: <sup>1</sup>H NMR (400MHz) Spectrum of 7e in CDCl<sub>3</sub> at 28 °C.



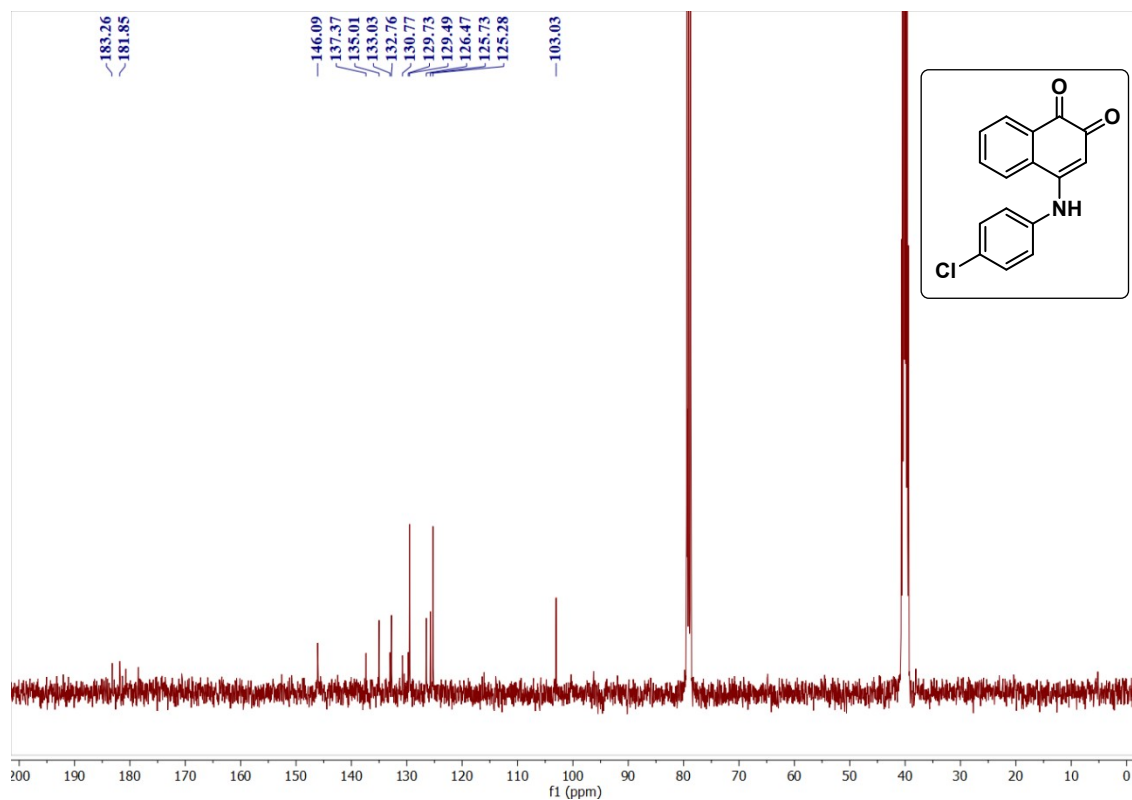

**Figure S19:** <sup>13</sup>C NMR (100 MHz) Spectrum of **7e** in CDCl<sub>3</sub>+DMSO-*d*<sub>6</sub> at 28 °C.

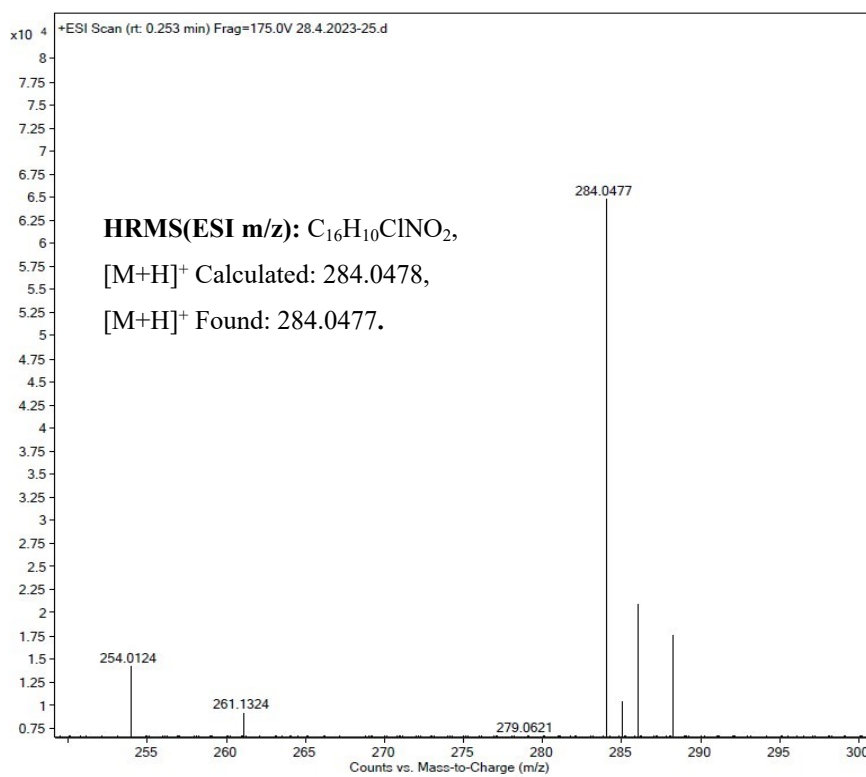

**Figure S20:** HRMS Spectrum of **7e**.

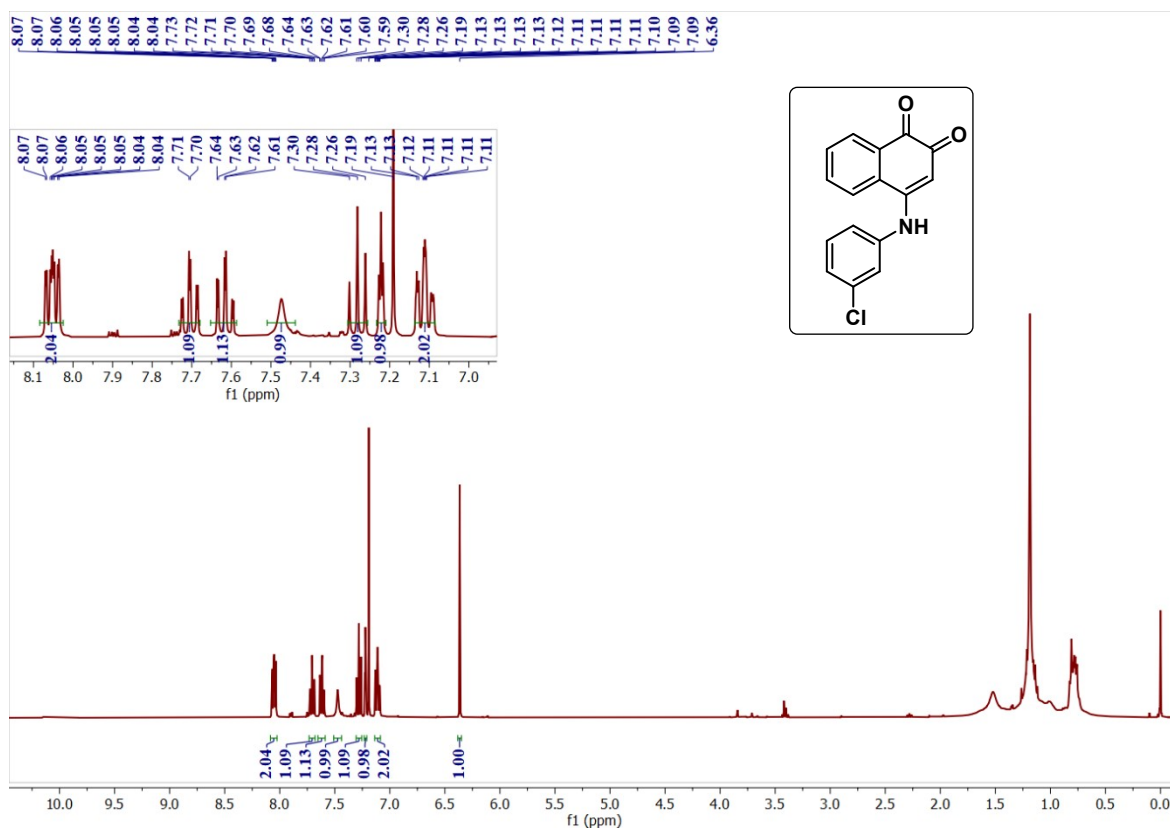

Figure S21: <sup>1</sup>H NMR (400MHz) Spectrum of 7f in CDCl<sub>3</sub> at 28 °C.

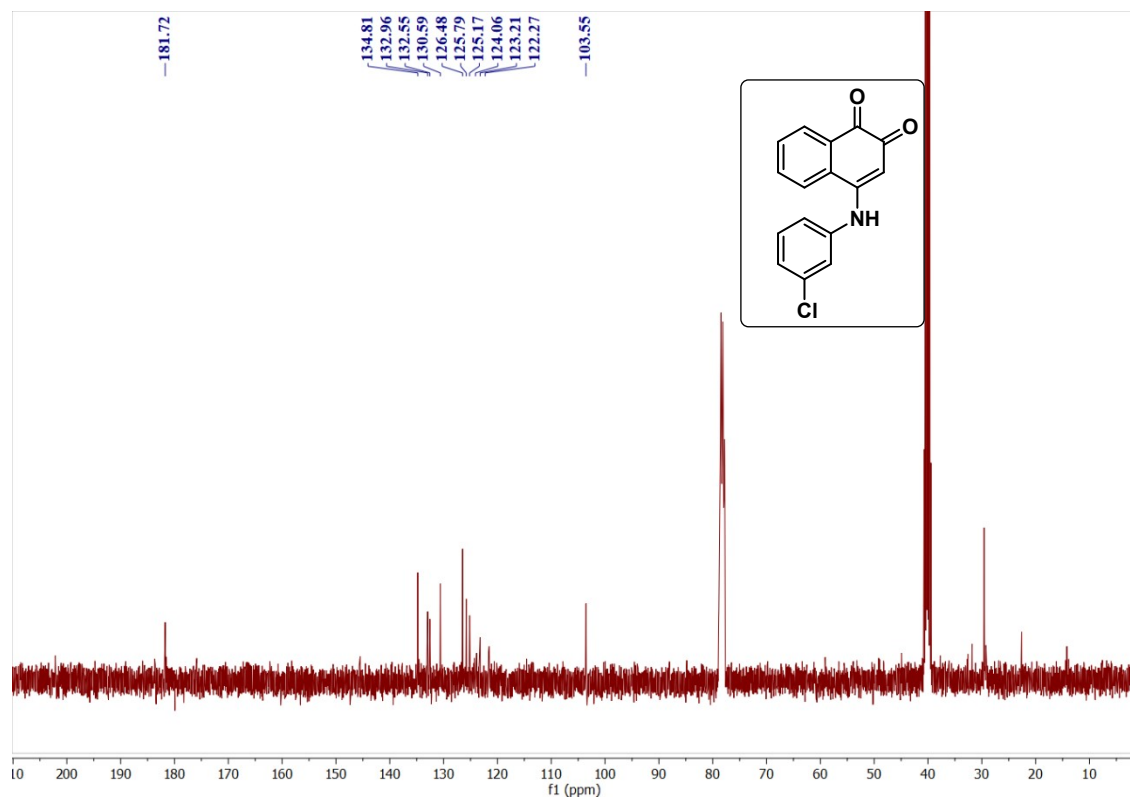

Figure S22: <sup>13</sup>C NMR (100 MHz) Spectrum of 7f in CDCl<sub>3</sub>+DMSO-d<sub>6</sub> at 28 °C.

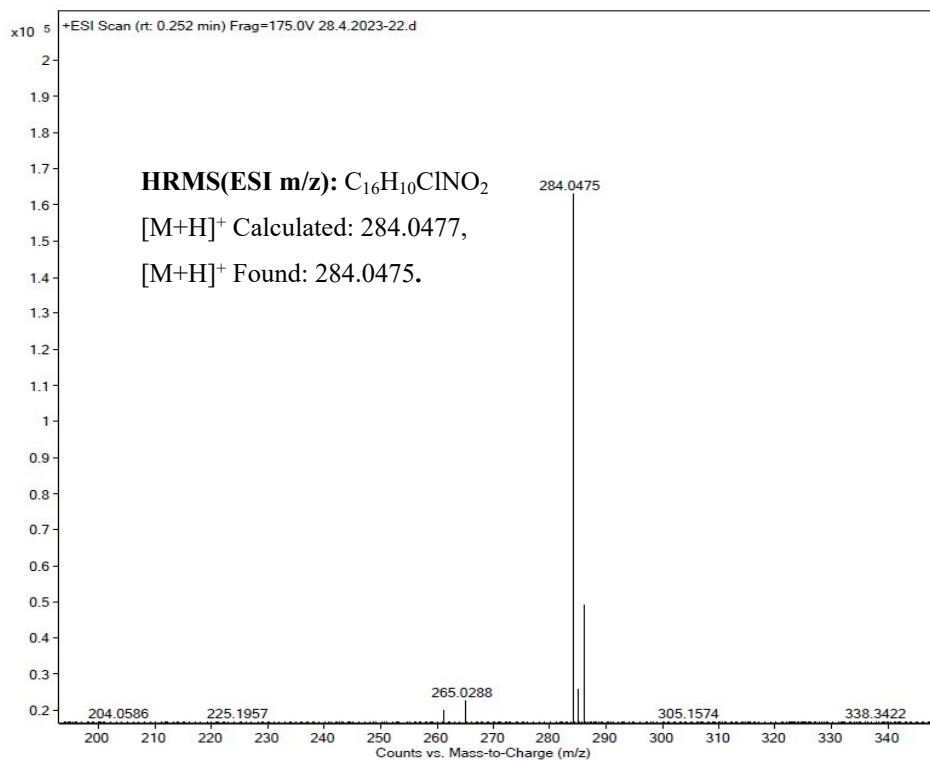

**Figure S23:** HRMS Spectrum of **7f**.

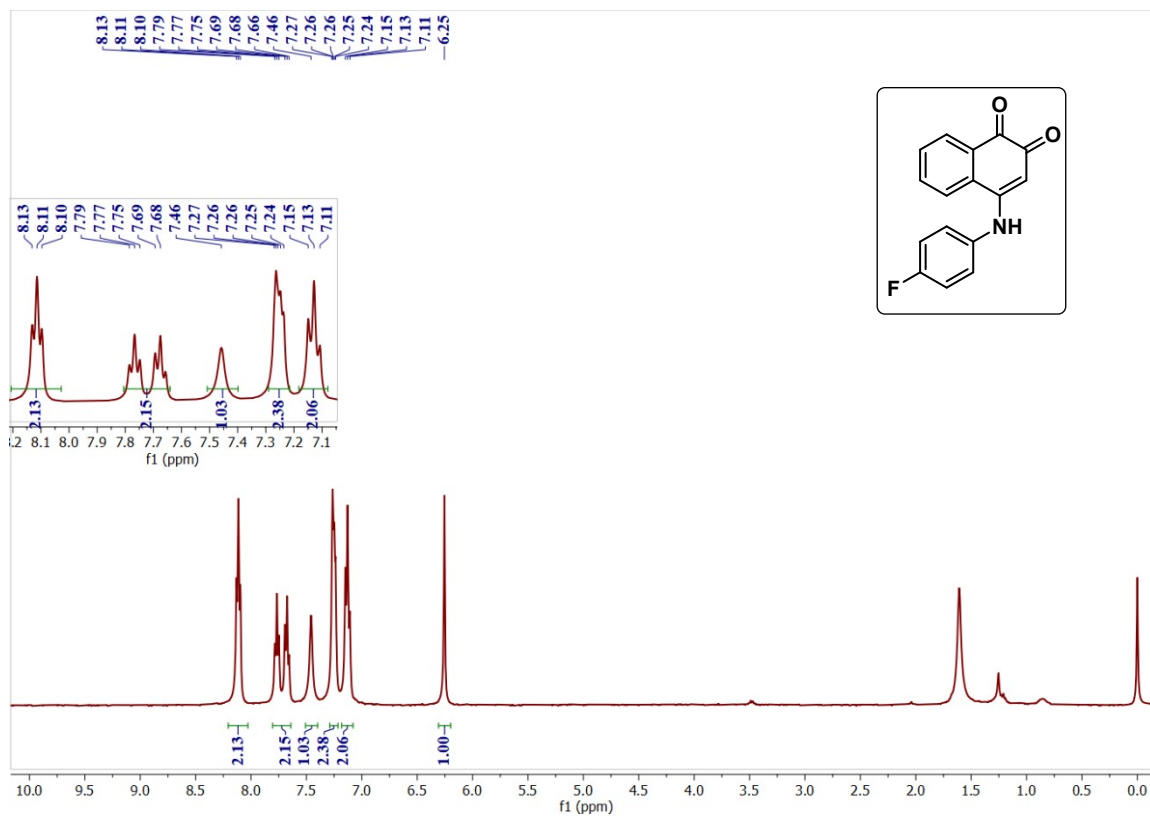

**Figure S24:** <sup>1</sup>H NMR (400MHz) Spectrum of **7g** in CDCl<sub>3</sub> at 28 °C.

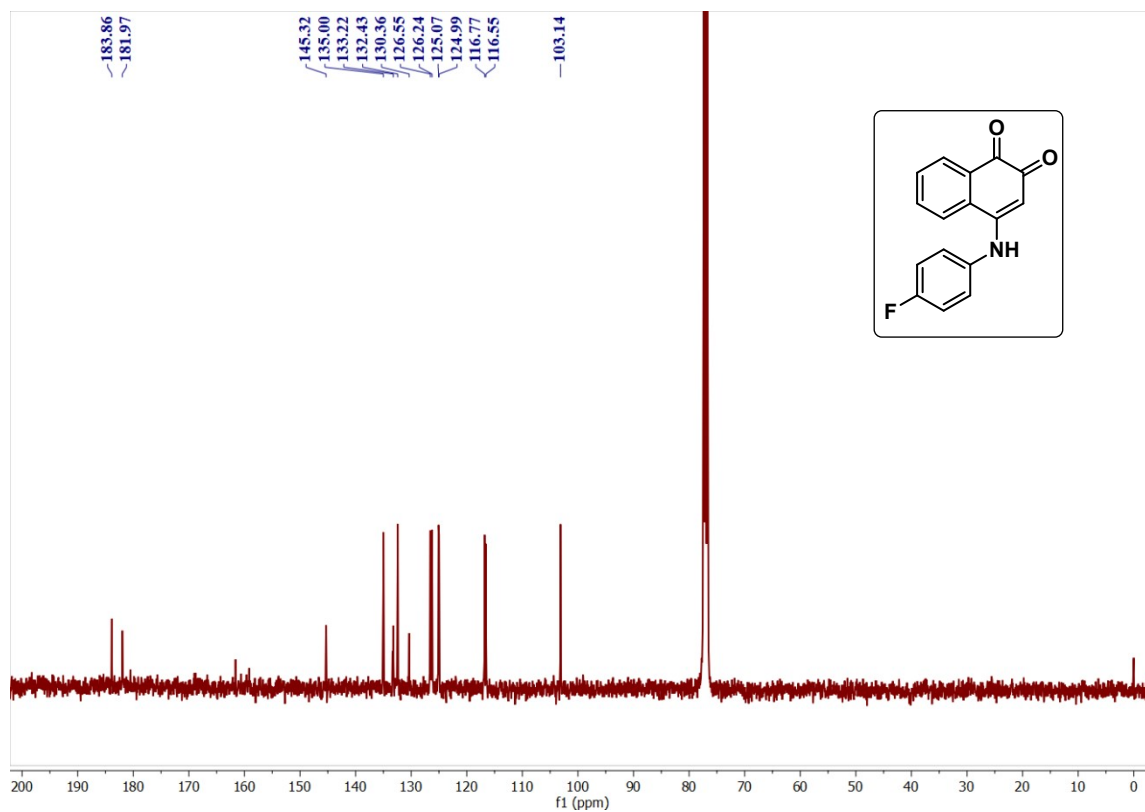

Figure S25: <sup>13</sup>C NMR (100 MHz) Spectrum of 7g in CDCl<sub>3</sub> at 28 °C.

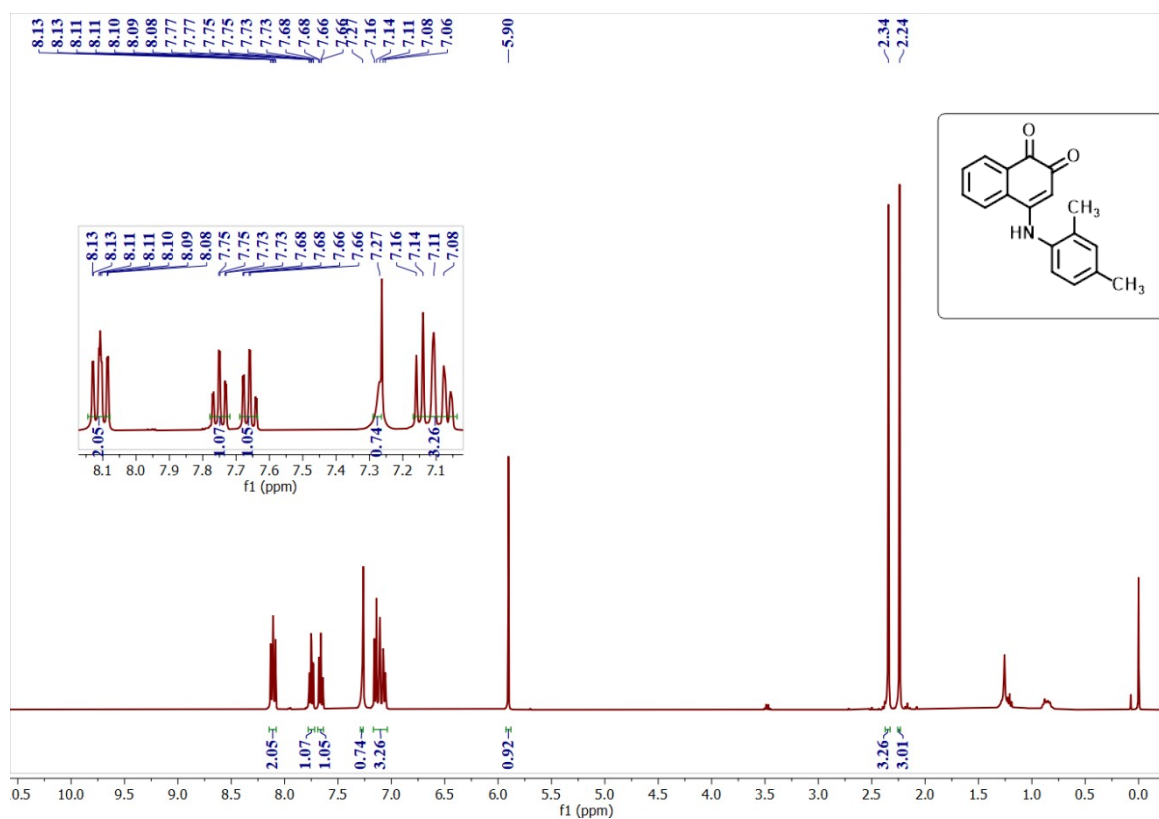

Figure S26: <sup>1</sup>H NMR (400 MHz) Spectrum of 7h in CDCl<sub>3</sub> at 28 °C.

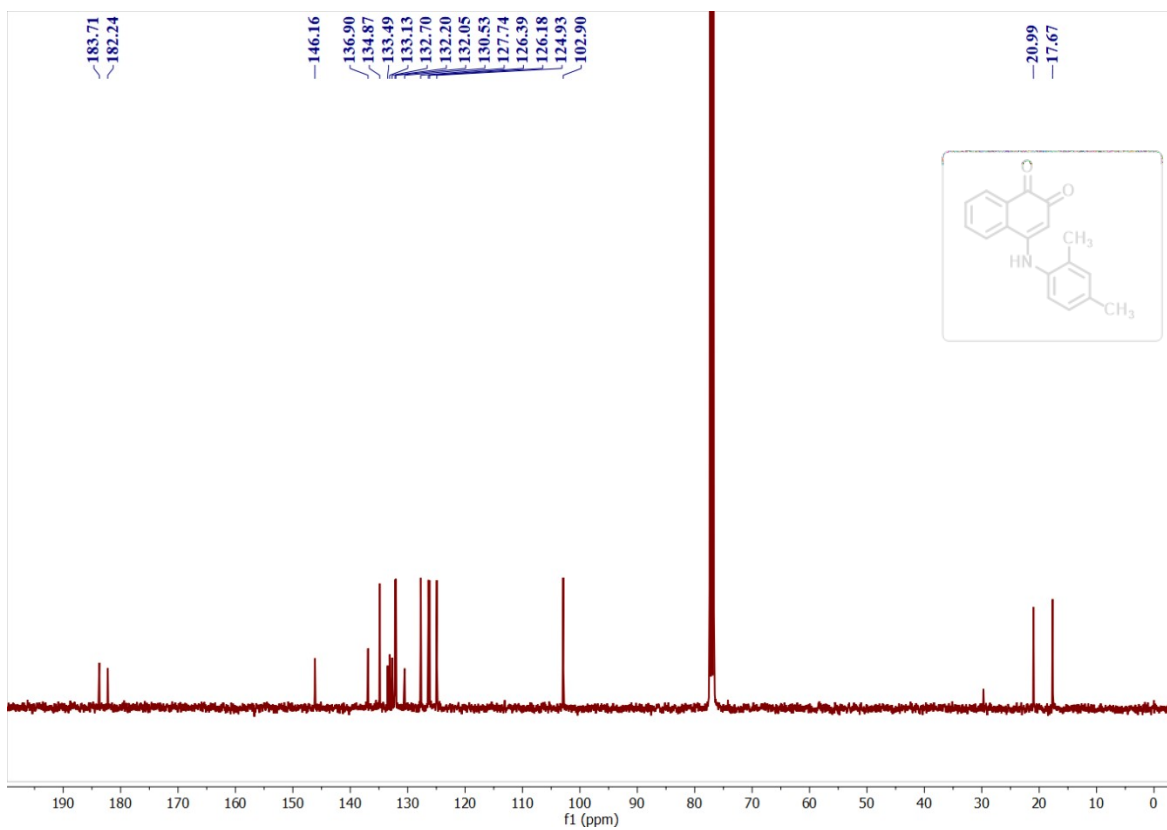

Figure S27:  $^{13}\text{C}$  NMR (100 MHz) Spectrum 7h in  $\text{CDCl}_3$  at 28 °C.

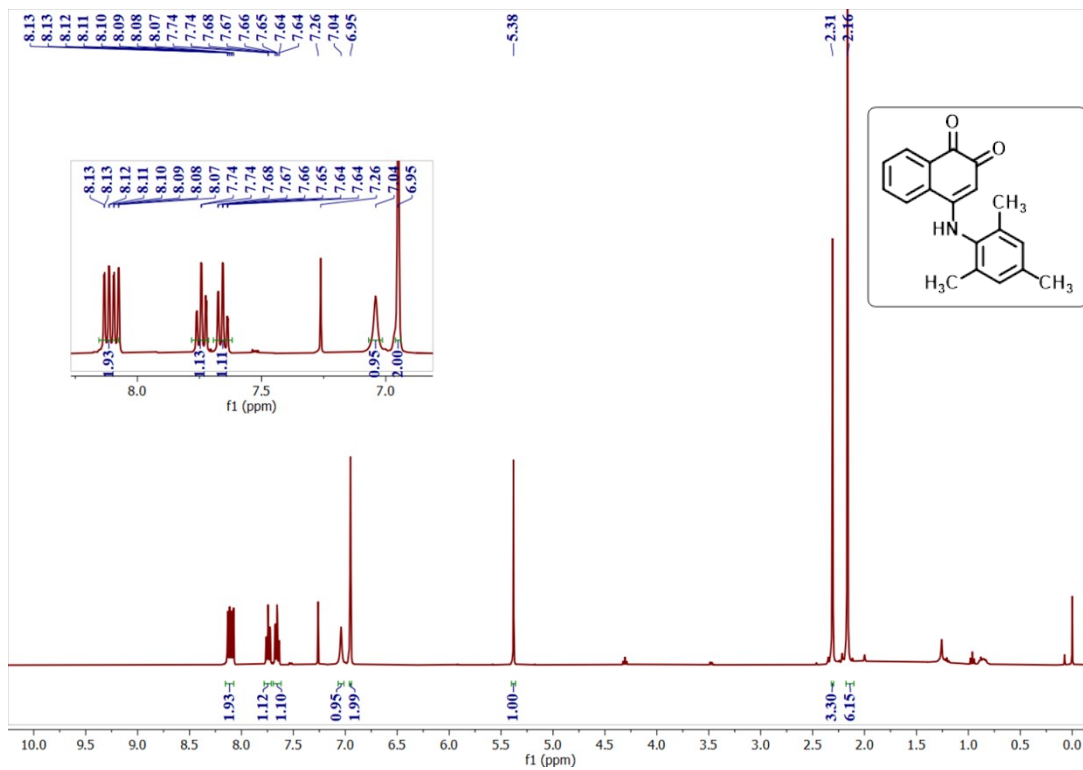

Figure S28:  $^1\text{H}$  NMR (400MHz) Spectrum of 7i in  $\text{CDCl}_3$  at 28 °C.

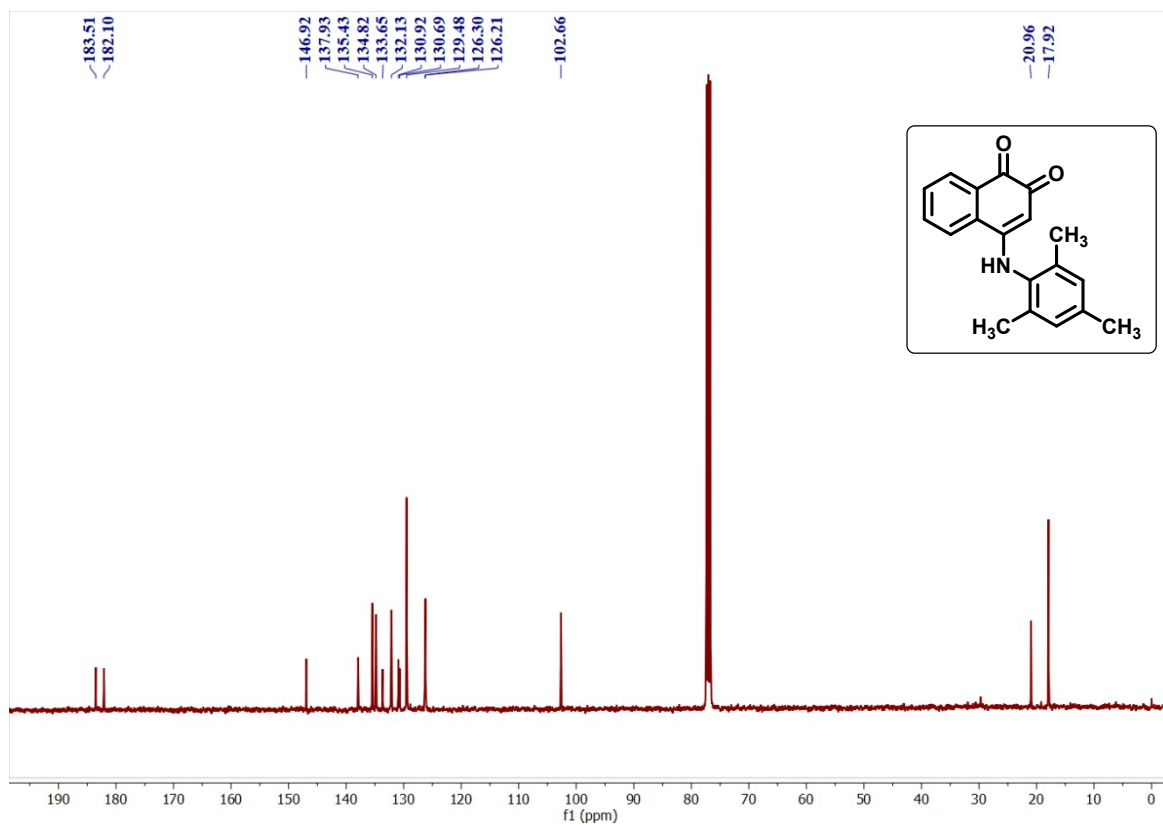

Figure S29: <sup>13</sup>C NMR (100 MHz) Spectrum 7i in CDCl<sub>3</sub> at 28 °C.

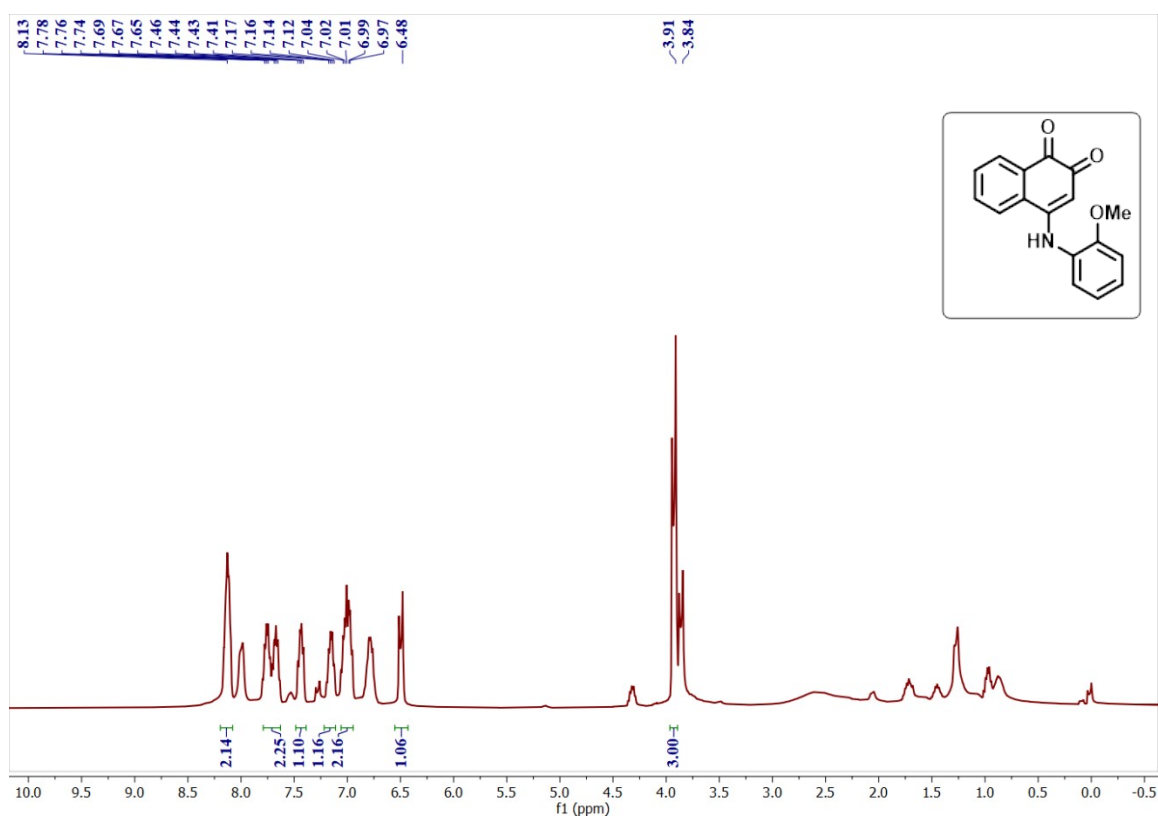

Figure S30: <sup>1</sup>H NMR (400MHz) Spectrum of 7j in CDCl<sub>3</sub> at 28 °C.

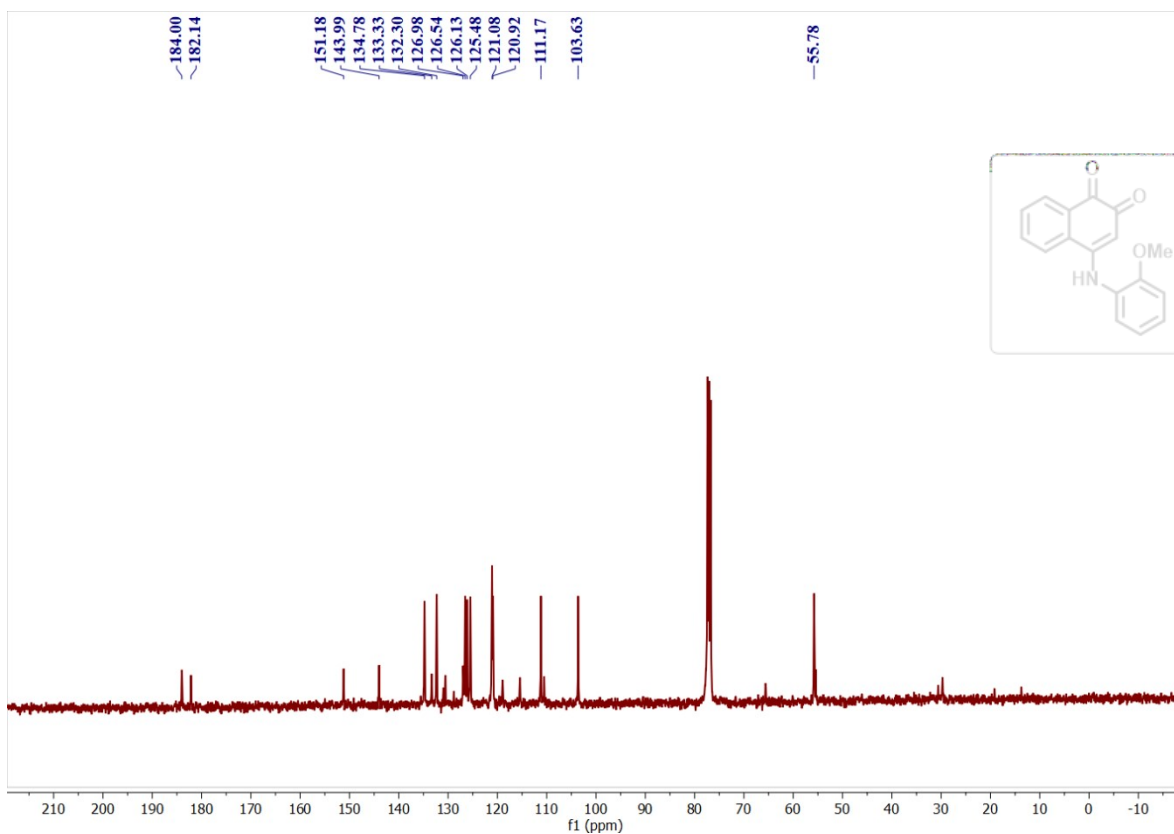

Figure S31: <sup>13</sup>C NMR (100 MHz) Spectrum 7j in CDCl<sub>3</sub> at 28 °C.

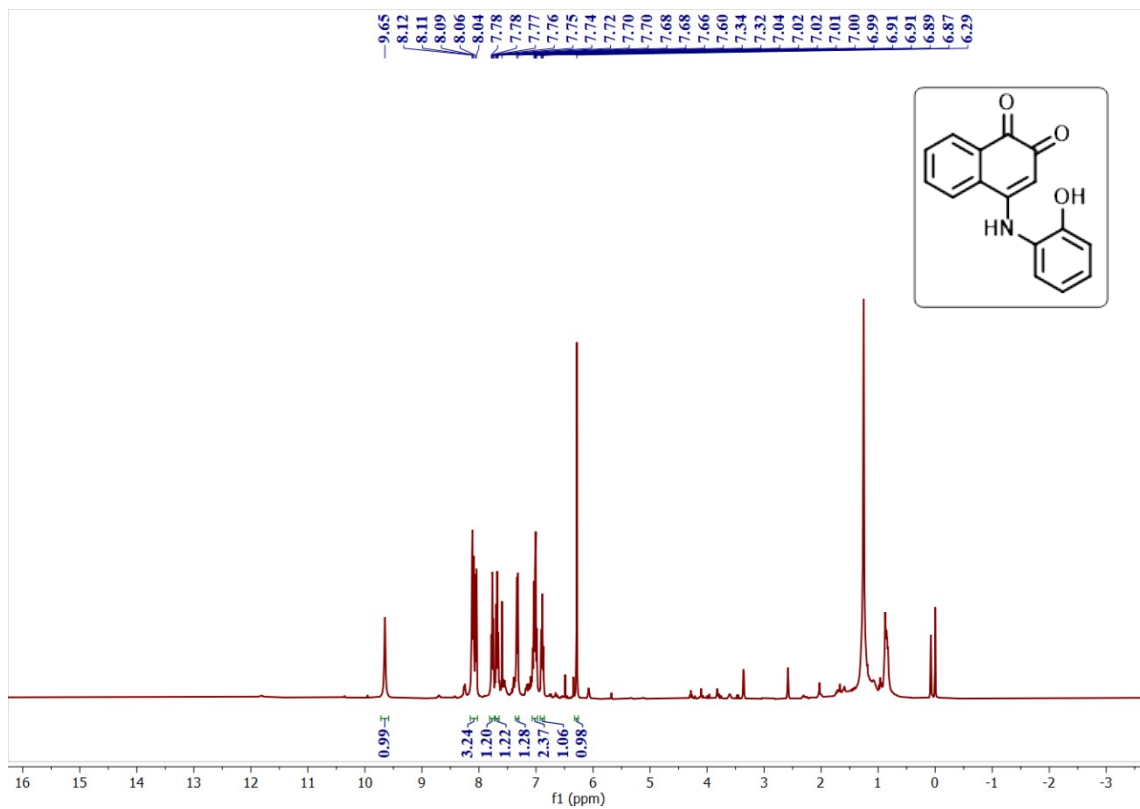

Figure S32: <sup>1</sup>H NMR (400MHz) Spectrum of 7k in CDCl<sub>3</sub> + DMSO at 28 °C.

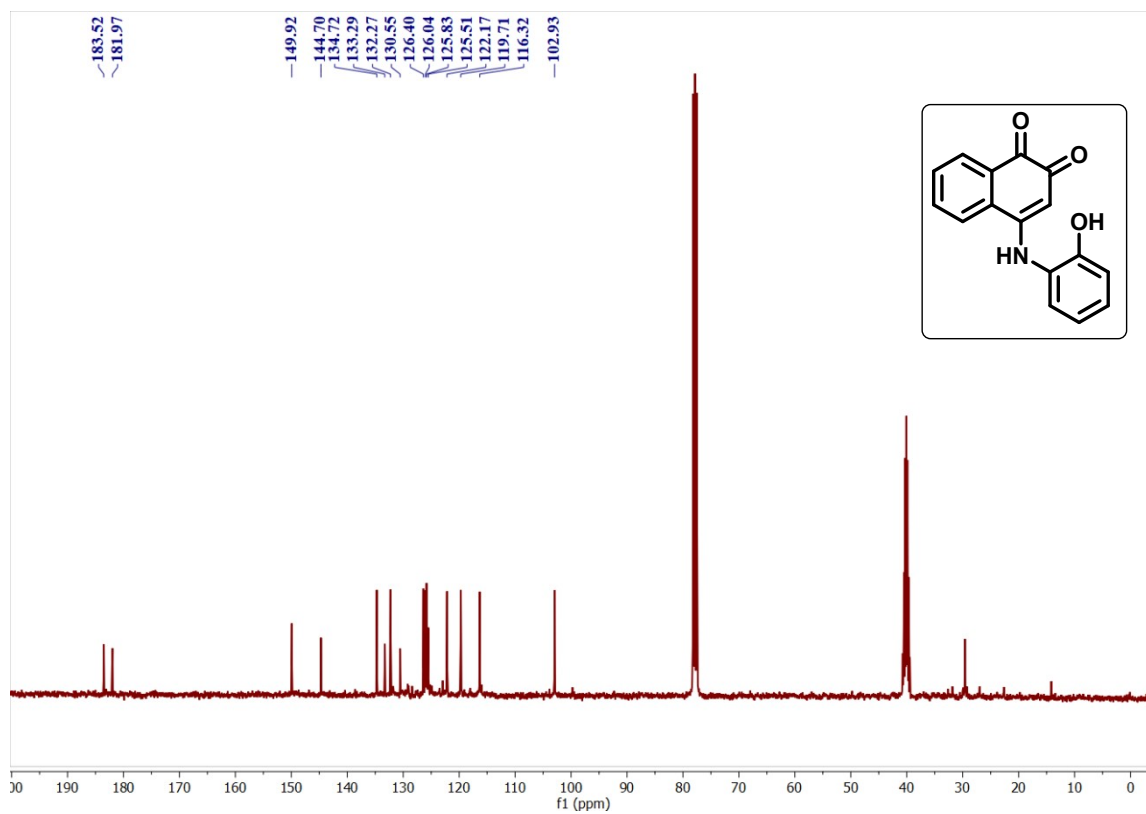

**Figure S33:** <sup>13</sup>C NMR (100 MHz) Spectrum of 7k in CDCl<sub>3</sub> + DMSO at 28 °C.

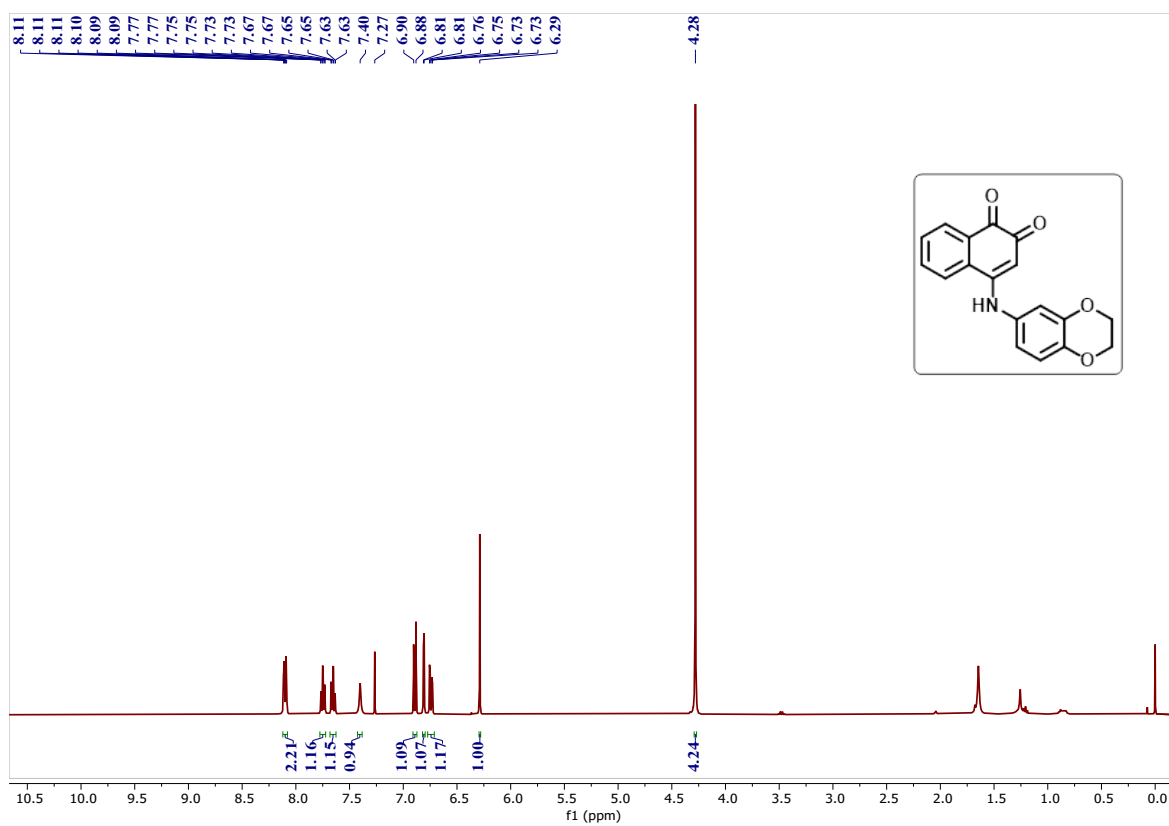

**Figure S34:** <sup>1</sup>H NMR (400 MHz) Spectrum of 7l in CDCl<sub>3</sub> at 28 °C.



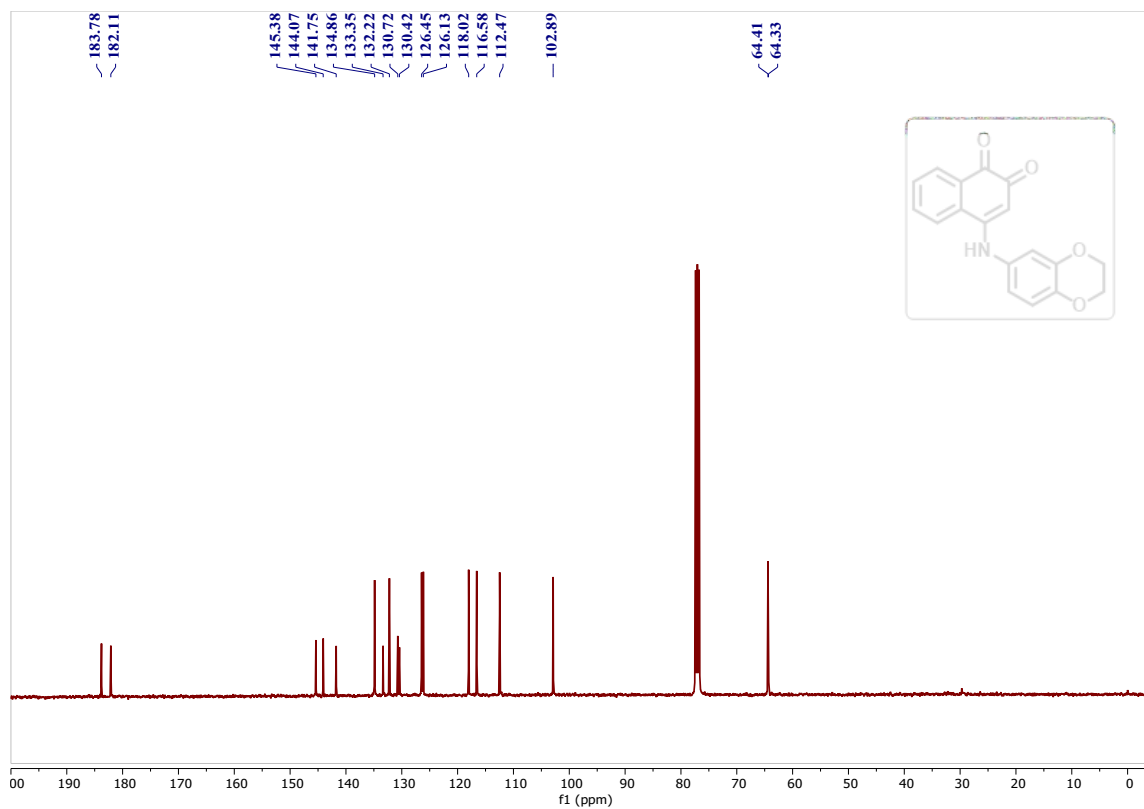

Figure S35:  $^{13}\text{C}$  NMR (100 MHz) Spectrum 7l in  $\text{CDCl}_3$  at 28 °C.

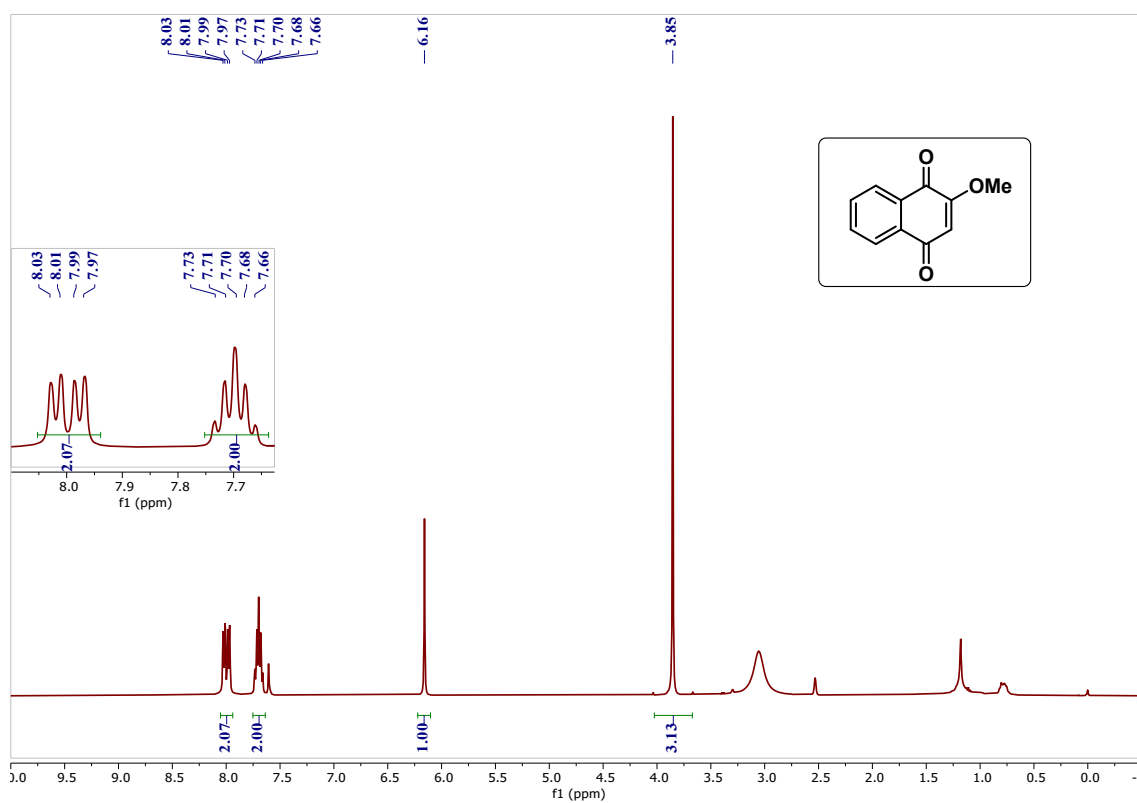

Figure S36:  $^1\text{H}$  NMR (400MHz) Spectrum of 8a in  $\text{CDCl}_3 + \text{DMSO}-d_6$  at 28 °C.

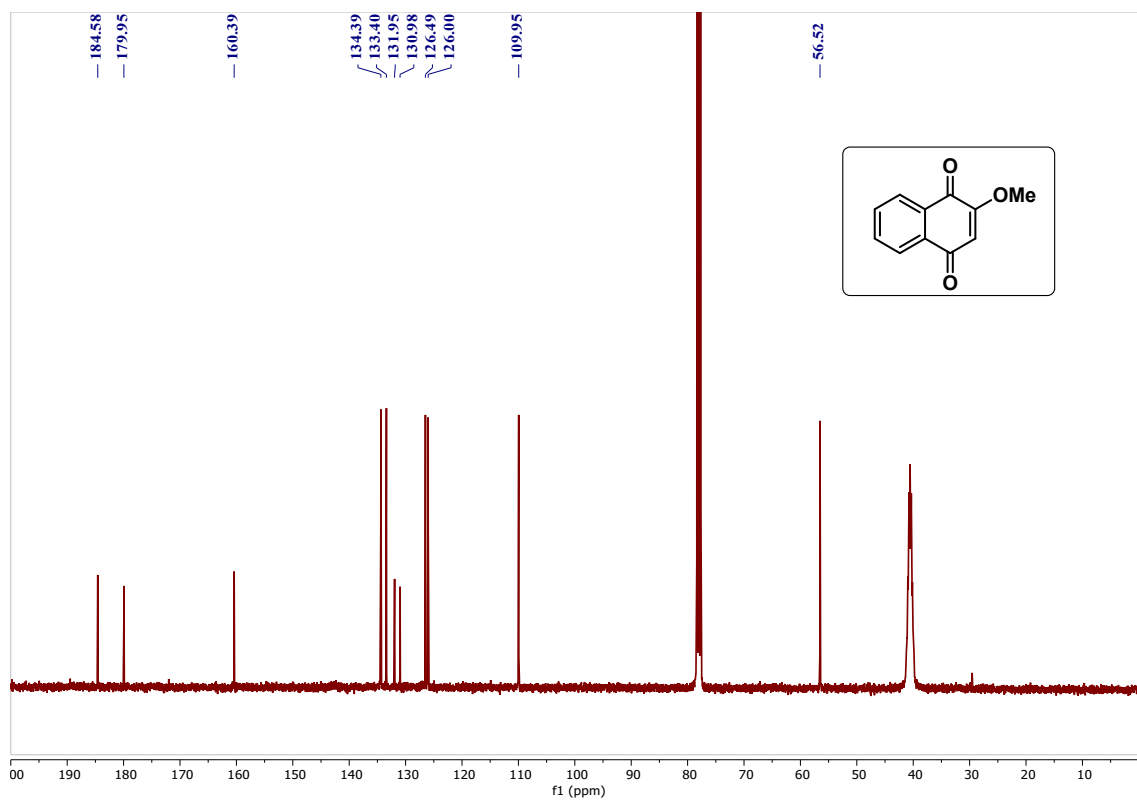

**Figure S37:**  $^{13}\text{C}$  NMR (100 MHz) Spectrum of **8a** in  $\text{CDCl}_3 + \text{DMSO-}d_6$  at  $28^\circ\text{C}$ .

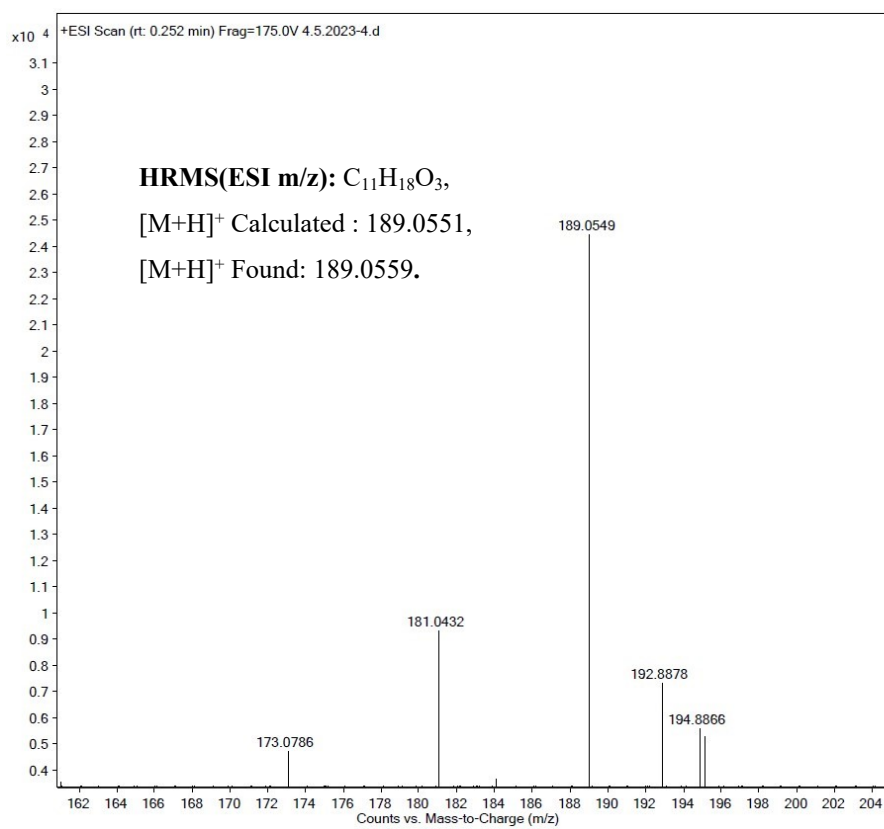

**Figure S27:** HRMS Spectrum of **8a**.

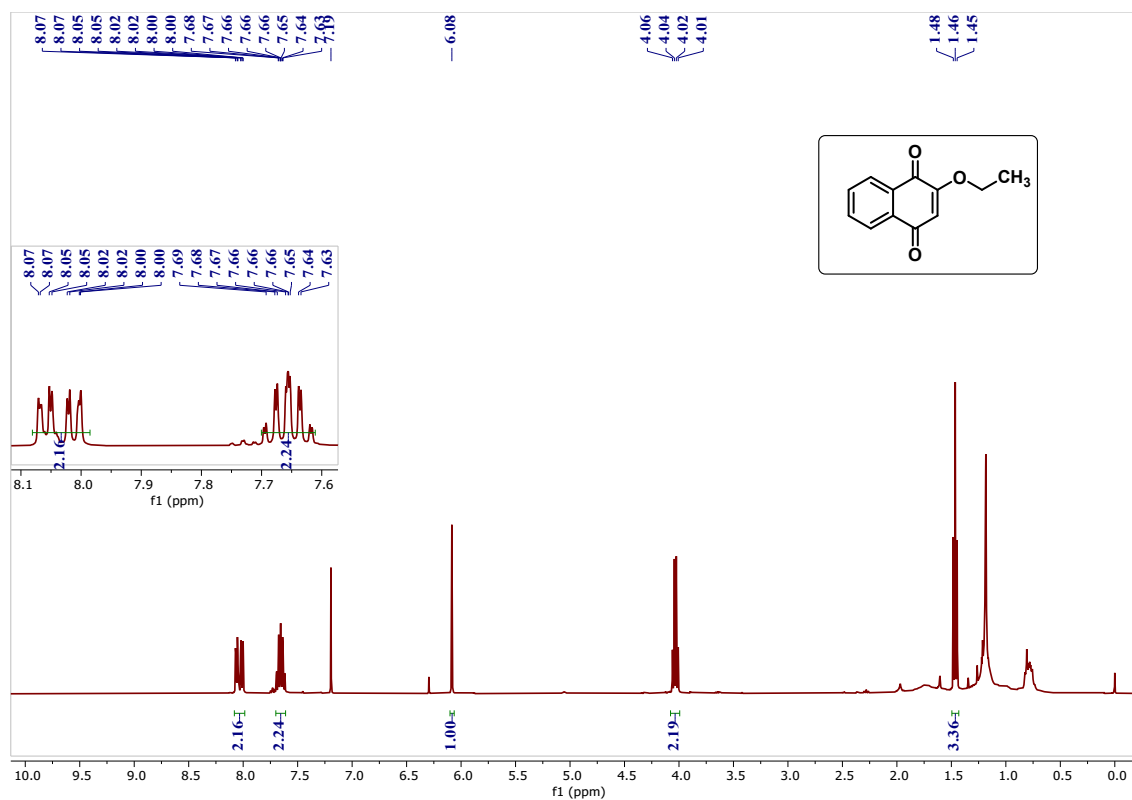

Figure S38: <sup>1</sup>H NMR (400MHz) Spectrum of **8b** in CDCl<sub>3</sub> at 28 °C.

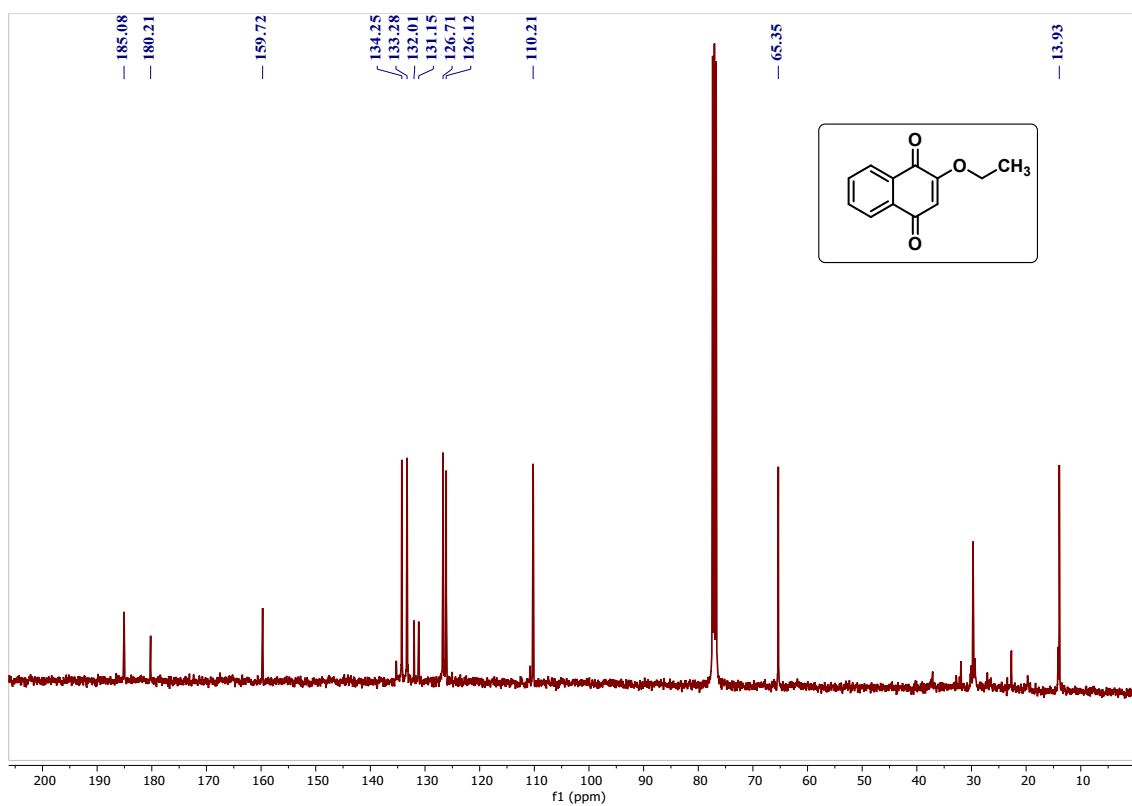

Figure S39: <sup>13</sup>C NMR (100 MHz) Spectrum of **8b** in CDCl<sub>3</sub> at 28 °C.

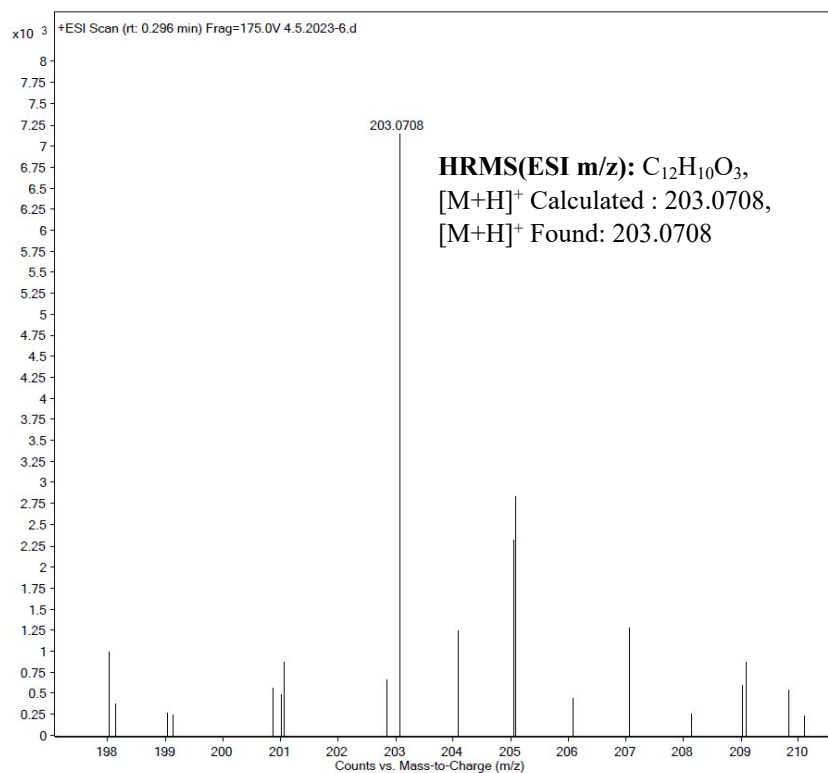

Figure S40: HRMS Spectrum of **8b**.

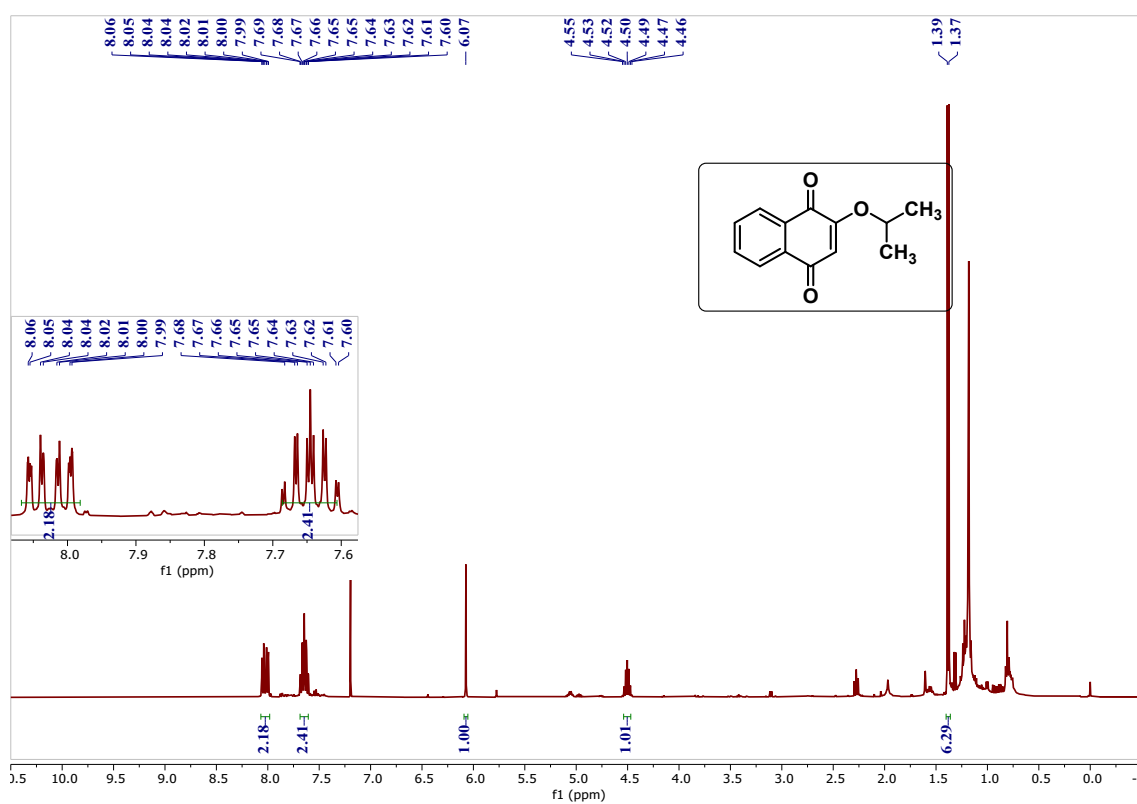

Figure S41: <sup>1</sup>H NMR (400MHz) Spectrum of **8c** in CDCl<sub>3</sub> at 28 °C.

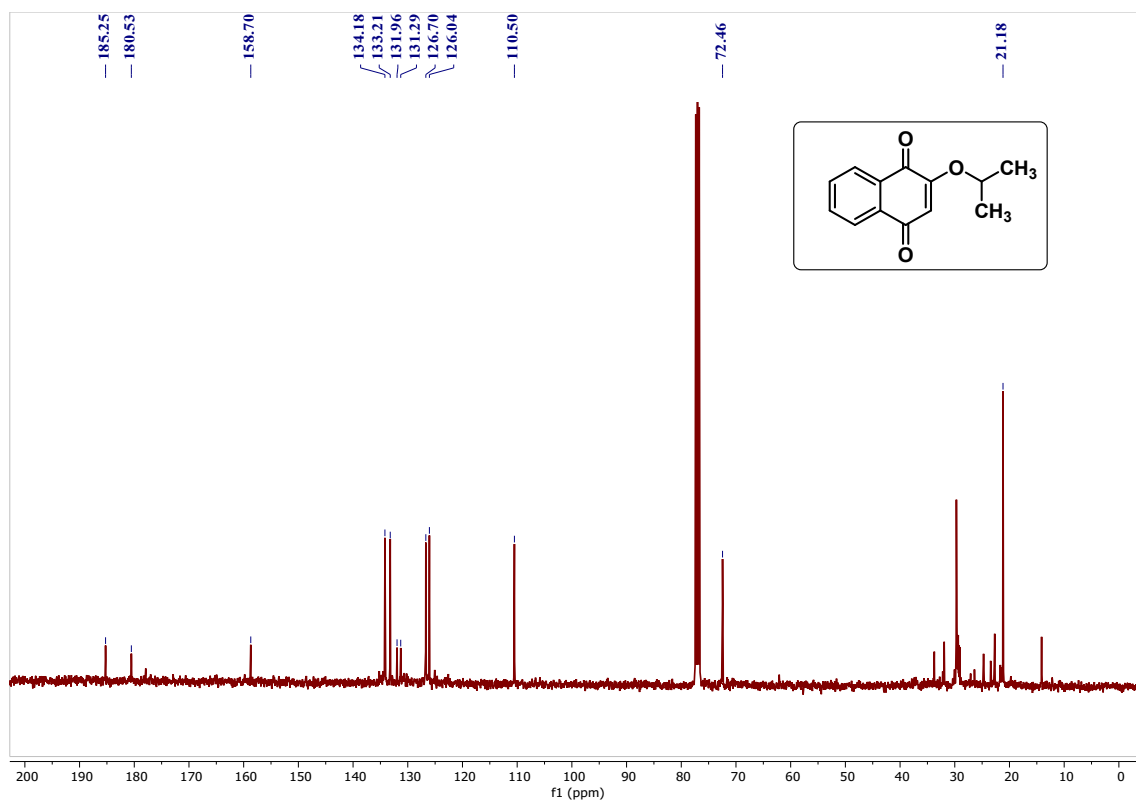

**Figure S42:**  $^{13}\text{C}$  NMR (100 MHz) Spectrum of **8c** in  $\text{CDCl}_3$  at 28 °C.

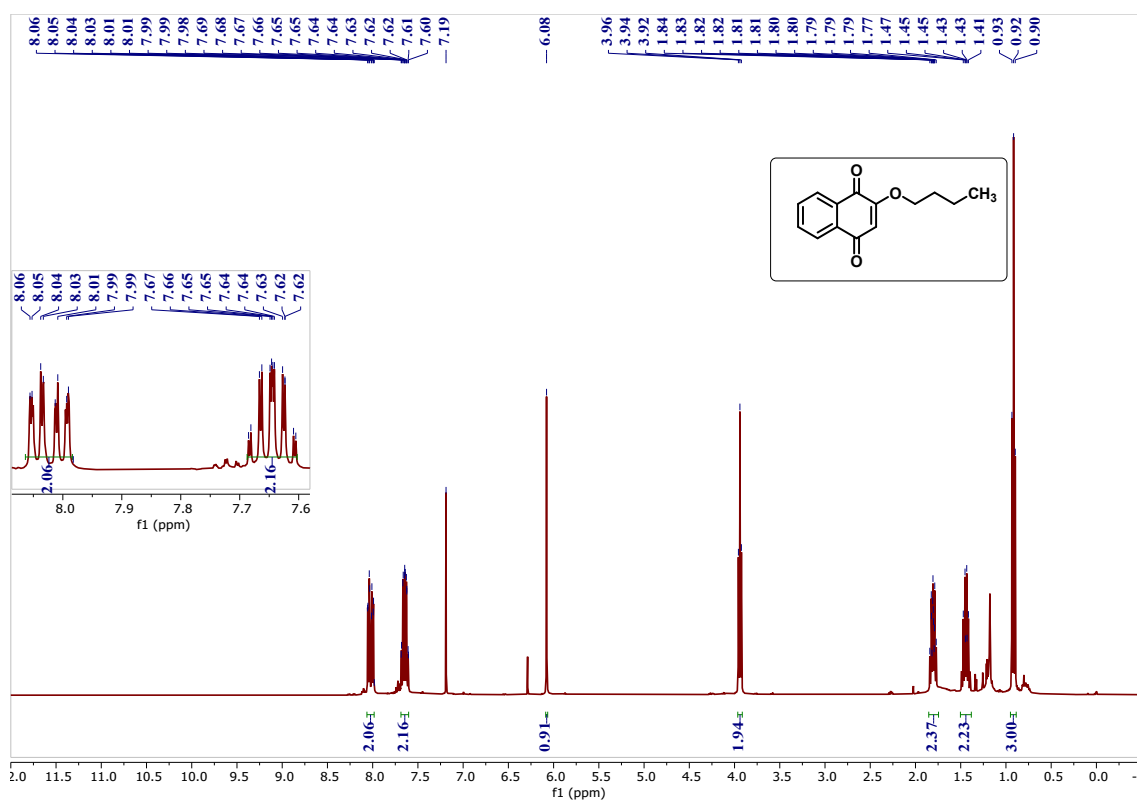

**Figure S43:**  $^1\text{H}$  NMR (400MHz) Spectrum of **8d** in  $\text{CDCl}_3$  at 28 °C.

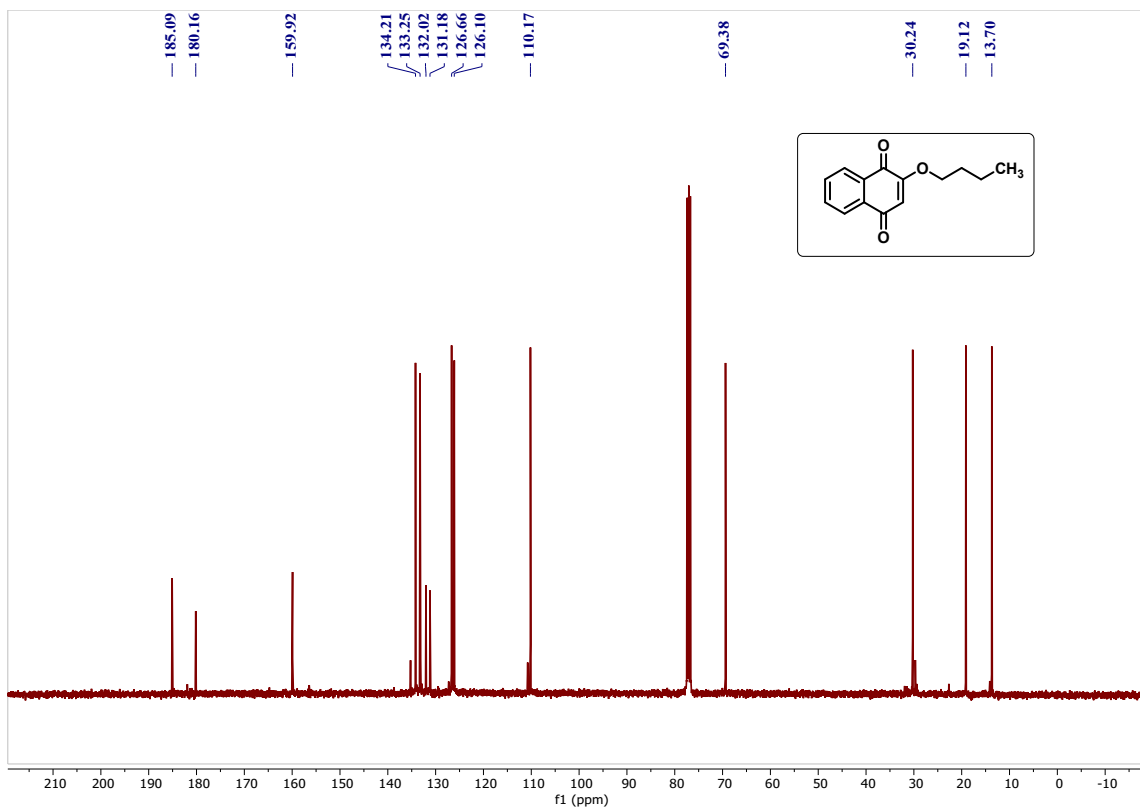

**Figure S44:**  $^{13}\text{C}$  NMR (100 MHz) Spectrum of **8d** in  $\text{CDCl}_3$  at  $28^\circ\text{C}$ .

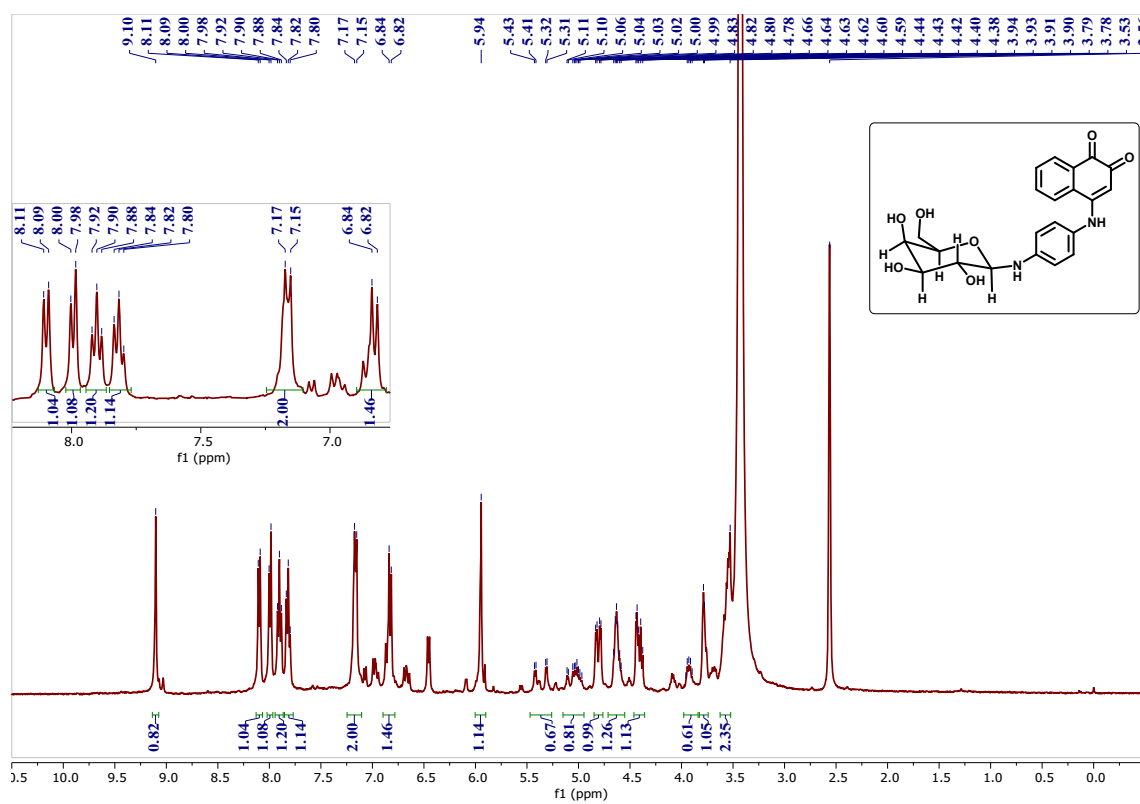

**Figure S45:**  $^1\text{H}$  NMR (400MHz) Spectrum of **10** in  $\text{DMSO}-d_6$  at  $28^\circ\text{C}$ .

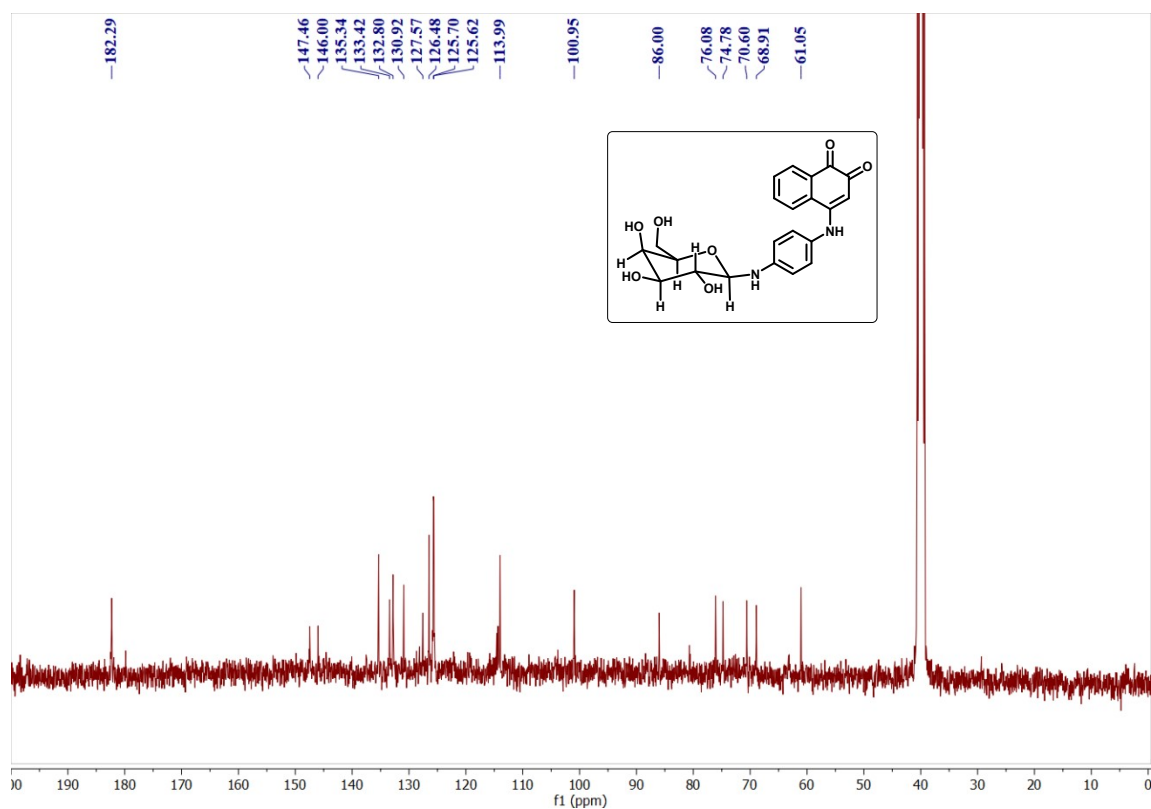

**Figure S46:**  $^{13}\text{C}$  NMR (100 MHz) Spectrum of **10** in  $\text{DMSO-}d_6$  at 28 °C.

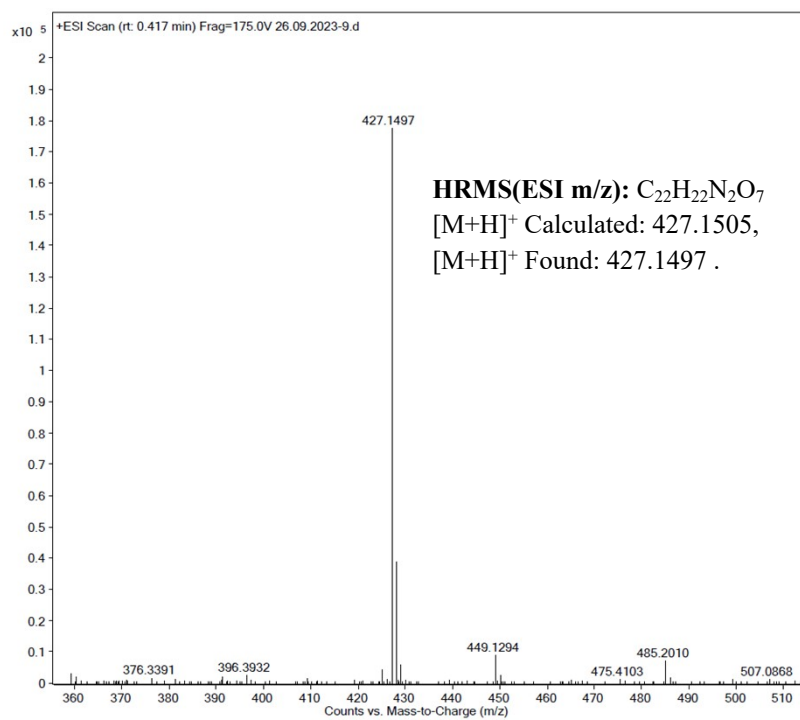

**Figure S47:** HRMS Spectrum of **10**.

7 IR

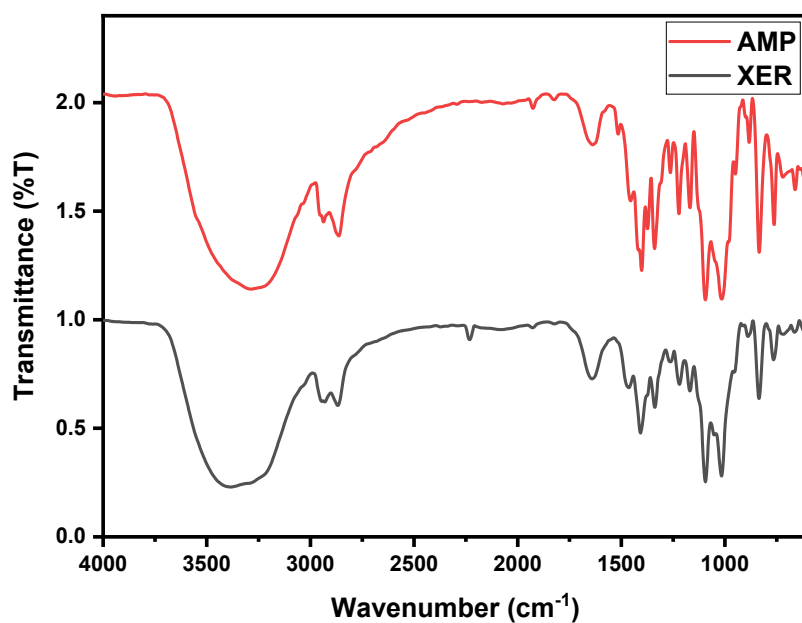

**Figure S48:** Comparison of IR spectrum of amorphous HMDBS and xerogel of HMDBS Eutectogels.

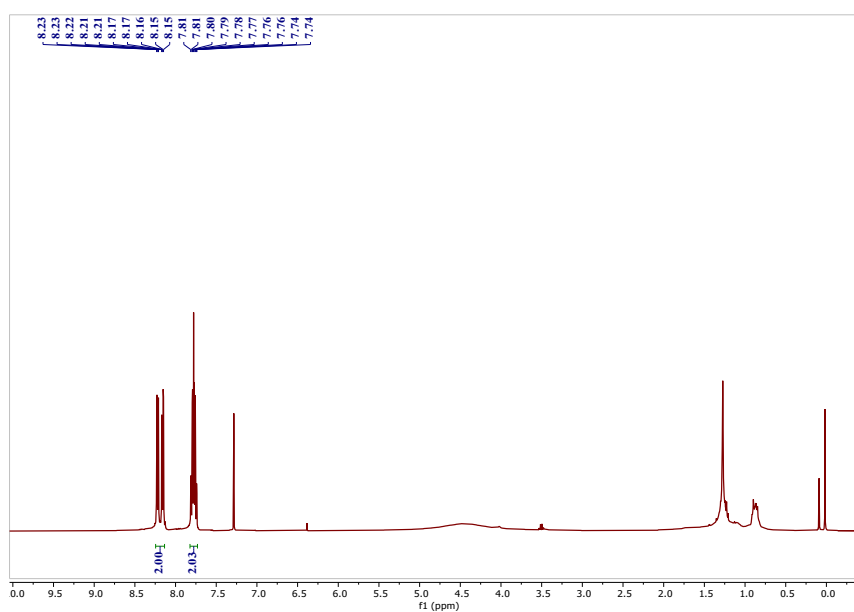

**Figure S49:**  $^1\text{H-NMR}$  Spectra of compound 8a in  $\text{CDCl}_3$  (400 MHz).<sup>8</sup>



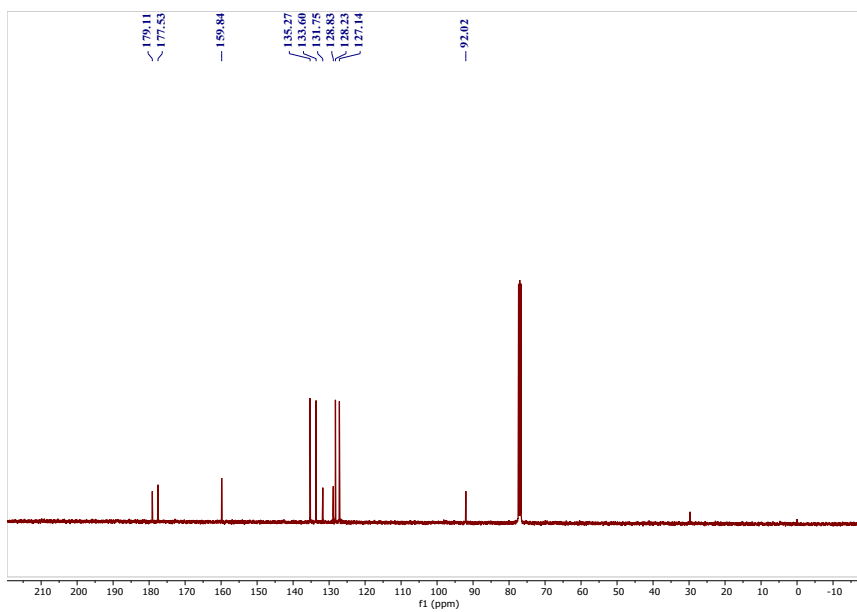

**Figure S50.**  $^{13}\text{C}$ -NMR Spectra of 8a in  $\text{CDCl}_3$  (100 MHz)<sup>8</sup>

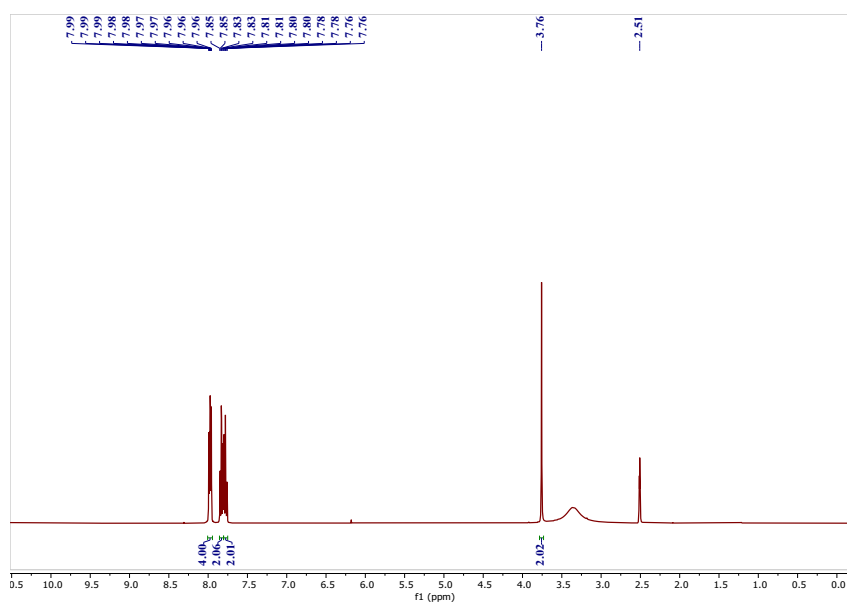

**Figure S51:**  $^1\text{H}$  NMR spectra of Compound 8b in  $\text{DMSO-d}_6$  (400 MHz).<sup>9</sup>

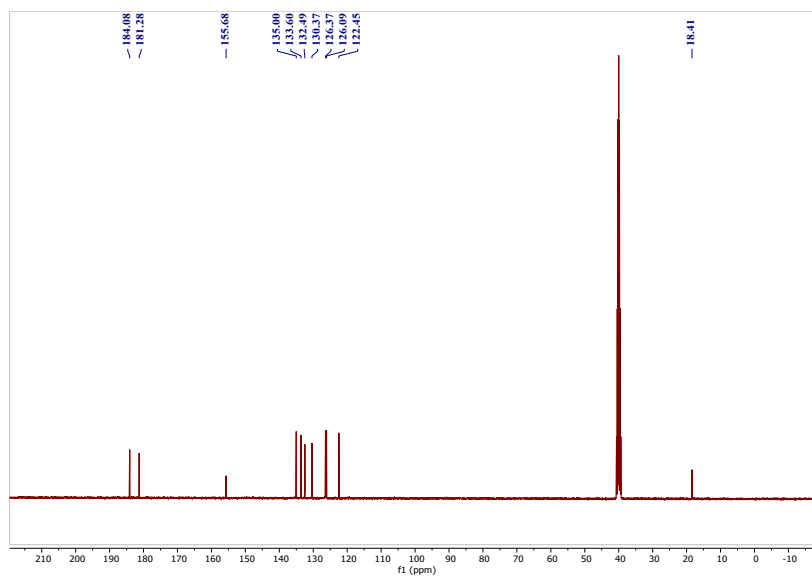

**Figure S52.** <sup>13</sup>C-NMR Spectra of **8b** in DMSO-d<sub>6</sub> (100 MHz).<sup>9</sup>

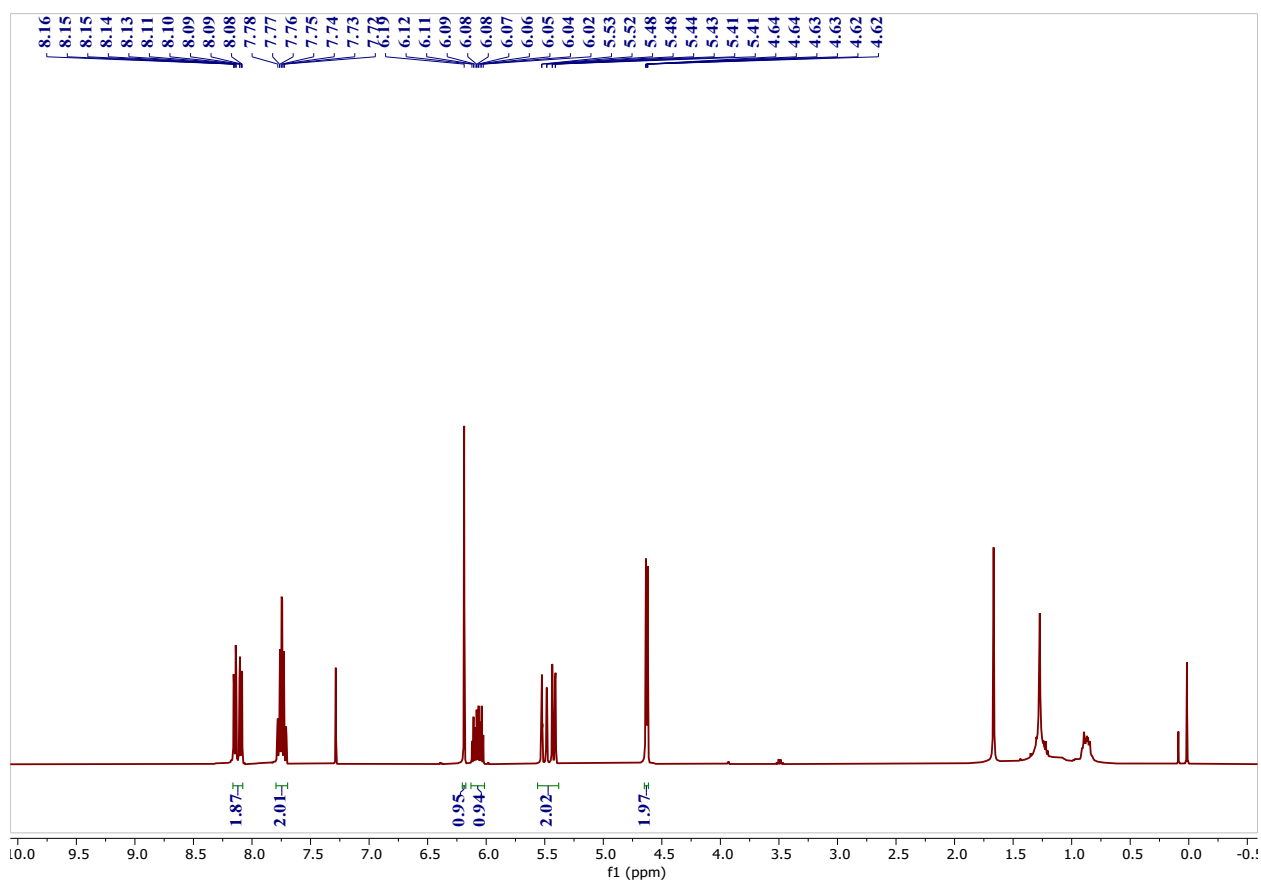

**Figure S53** <sup>1</sup>H-NMR Spectra of **8c** in CDCl<sub>3</sub> (400 MHz).<sup>10</sup>

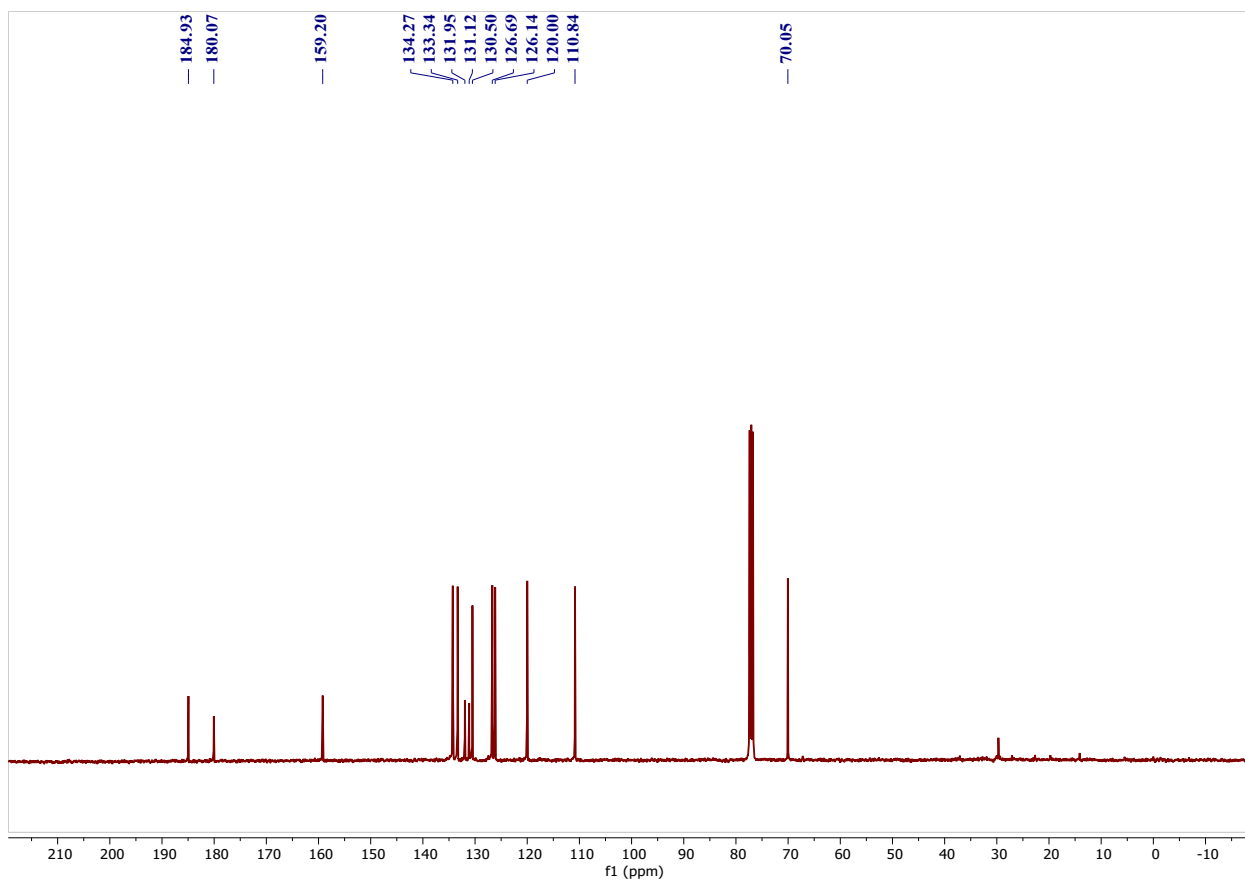

Figure S54.  $^{13}\text{C}$ -NMR Spectra of 8c in  $\text{CDCl}_3$  (100 MHz).<sup>10</sup>

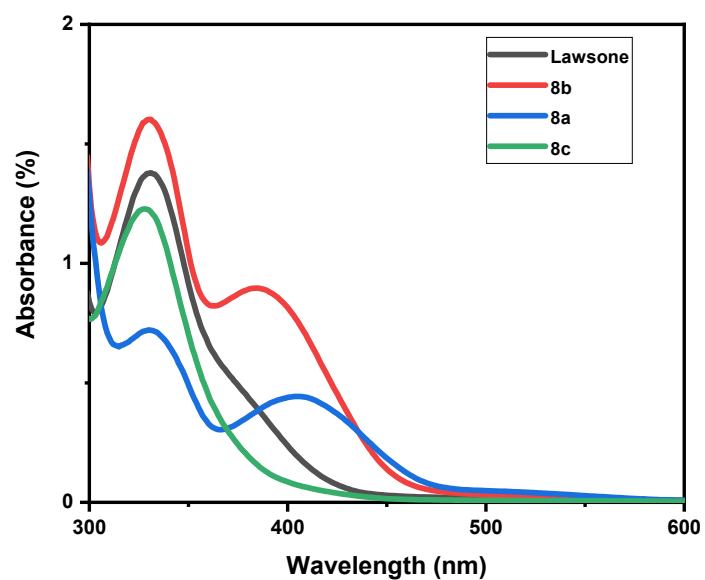

Figure S55. UV-vis spectra of lawson, compound 8a, 8b, and 8c in THF.

## References

- (1) Tseng, C. H.; Lin, C. K.; Chen, Y. L.; Tseng, C. K.; Lee, J. Y.; Lee, J. C. Discovery of Naphtho[1,2-d]Oxazole Derivatives as Potential Anti-HCV Agents through Inducing Heme Oxygenase-1 Expression. *Eur. J. Med. Chem.* **2018**, *143*, 970–982. <https://doi.org/10.1016/j.ejmech.2017.12.006>.
- (2) Tseng, C. H.; Cheng, C. M.; Tzeng, C. C.; Peng, S. I.; Yang, C. L.; Chen, Y. L. Synthesis and Anti-Inflammatory Evaluations of  $\beta$ -Lapachone Derivatives. *Bioorganic Med. Chem.* **2013**, *21* (2), 523–531. <https://doi.org/10.1016/j.bmc.2012.10.047>.
- (3) Singh, P.; Baheti, A.; Thomas, K. R. J. Synthesis and Optical Properties of Acidochromic Amine-Substituted Benzo[a]Phenazines. *J. Org. Chem.* **2011**, *76* (15), 6134–6145. <https://doi.org/10.1021/jo200857p>.
- (4) Urbanek, R. A.; Suchard, S. J.; Steelman, G. B.; Knappenberger, K. S.; Sygowski, L. A.; Veale, C. A.; Chapdelaine, M. J. Potent Reversible Inhibitors of the Protein Tyrosine Phosphatase CD45. *J. Med. Chem.* **2001**, *44* (11), 1777–1793. <https://doi.org/10.1021/jm000447i>.
- (5) Gornostaev, L. M.; Rukovets, T. A.; Arnold, E. V.; Khalyavina, Y. G.; Gatilov, Y. V. Oximation of 2-(R1-Amino)-4-(R2-Imino)Naphthalen-1(4H)-Ones. *Russ. J. Org. Chem.* **2018**, *54* (1), 78–86. <https://doi.org/10.1134/S1070428018010062>.
- (6) Sousa, A. C.; Santos, I.; Piedade, M. F. M. M.; Martins, L. O.; Robalo, M. P. Synthesis of Substituted 4-Arylamino-1,2-Naphthoquinones in One-Pot Reactions Using CotA-Laccase as Biocatalyst. *Adv. Synth. Catal.* **2020**, *362* (16), 3380–3387. <https://doi.org/10.1002/adsc.202000082>.
- (7) Moser, H.; Lu, Q.; Patten, P. A.; Wang, D.; Kasar, R.; Kaldor, S.; Patterson, B. D. Preparation of Antibacterial Agents. WO 2008/154642, 2008.
- (8) Costa, D. C. S.; da S. M. Forezi, L.; Lessa, M. D.; Delarmelina, M.; Matuck, B. V. A.; Freitas, M. C. R.; Ferreira, V. F.; Jackson, J. A. L.; José, J. W.; de C. da Silva, F. A. Stereoselective, Base-Free, Palladium-Catalyzed Heck Coupling Between 3-Halo-1,4-Naphthoquinones and Vinyl-1H-1,2,3-Triazoles. *ChemistrySelect* **2022**, *7* (24). <https://doi.org/10.1002/slct.202201334>.
- (9) Liu, Z.; Yin, S.; Zhang, R.; Zhu, W.; Fu, P. High-Efficiency Synthesis of Carbon-Bridged Dimers via Bioinspired Green Dimerization Involving Aldehydes. *ACS*

*Sustain. Chem. Eng.* **2022**, 10 (1), 655–661.

<https://doi.org/10.1021/acssuschemeng.1c07635>.

- (10) Yu, J.; Li, S.; Zeng, X.; Song, J.; Hu, S.; Cheng, S.; Chen, C.; Luo, H.; Pan, W. Design, Synthesis, and Evaluation of Proliferation Inhibitory Activity of Novel L-Shaped Ortho-Quinone Analogs as Anticancer Agents. *Bioorg. Chem.* **2021**, 117 (September), 105383. <https://doi.org/10.1016/j.bioorg.2021.105383>.
